# Supplementary material for: The natural history of TB disease-a synthesis of data to quantify progression and regression across the spectrum
Source: bioRxiv or medRxiv preprint supplement (doi:10.1101/2021.09.13.21263499), 2022-06-07
Supplement: Supplementary file [file media-1.pdf]

## Supplementary Materials

|           |                                                                  |           |
|-----------|------------------------------------------------------------------|-----------|
| <b>S1</b> | <b>Disease model structure</b> -----                             | <b>2</b>  |
|           | Figure 1 - TB disease natural history model-----                 | 3         |
| <b>S2</b> | <b>Open TB vs Clinical TB</b> -----                              | <b>3</b>  |
| <b>S3</b> | <b>Symptomatic Minimal</b> -----                                 | <b>4</b>  |
|           | Figure 2 – Progression rates from minimal disease -----          | 5         |
| <b>S4</b> | <b>Data inclusion and exclusion</b> -----                        | <b>6</b>  |
| S4.1      | Data types-----                                                  | 6         |
| S4.2      | Timings-----                                                     | 6         |
| S4.3      | Included data-----                                               | 6         |
|           | Table 1- Included data -----                                     | 6         |
| S4.4      | Excluded data -----                                              | 17        |
|           | Table 2 – Excluded data-----                                     | 17        |
| <b>S5</b> | <b>Fitting process</b> -----                                     | <b>21</b> |
|           | Figure 3 – Trace plots -----                                     | 22        |
|           | Figure 4 – Correlation plots-----                                | 23        |
| S5.1      | Weighting -----                                                  | 23        |
| S5.2      | Recovery from Minimal -----                                      | 24        |
|           | Figure 5 – Recovery from minimal -----                           | 24        |
| S5.3      | Duration of disease-----                                         | 25        |
| S5.4      | True Minimals-----                                               | 25        |
|           | Table 3 – True minimal -----                                     | 25        |
|           | Figure 6 – Meta analysis on true minimal-----                    | 25        |
| <b>S6</b> | <b>Disease pathways</b> -----                                    | <b>26</b> |
|           | Figure 7 – Trajectories, TB death -----                          | 26        |
|           | Figure 8 – Trajectories, TB recovery -----                       | 26        |
|           | Figure 9 – Trajectories, subclinical-----                        | 27        |
|           | Figure 10 – Trajectories, clinical-----                          | 27        |
|           | Figure 11 – Trajectories, minimal -----                          | 28        |
|           | Figure 12 – Trajectories, undulating 1-----                      | 28        |
|           | Figure 13 – Trajectories, undulating 2-----                      | 29        |
| <b>S7</b> | <b>Duration of symptoms</b> -----                                | <b>29</b> |
| <b>S8</b> | <b>Additional results</b> -----                                  | <b>32</b> |
|           | Figure 14 – Duration from subclinical disease-----               | 33        |
|           | Figure 15 – Duration from clinical disease -----                 | 34        |
|           | Figure 16 – Duration from minimal disease -----                  | 35        |
|           | Figure 17 – Duration from clinical/subclinical even split -----  | 36        |
|           | Figure 18 – Duration from clinical/subclinical 70/30 split ----- | 37        |
|           | Figure 19 – Duration from clinical/subclinical 30/70 split ----- | 38        |
| <b>S9</b> | <b>Sensitivity Analyses</b> -----                                | <b>38</b> |
| S9.1      | Fitting-----                                                     | 38        |
| S9.1.1    | Bootstrap studies -----                                          | 38        |
|           | Table 4 – Sensitivities, bootstrapped -----                      | 39        |
| S9.1.2    | Change recovery-----                                             | 40        |
|           | Table 5 – Sensitivities, recovery from minimal -----             | 40        |
| S9.1.3    | Change duration of infectiousness-----                           | 40        |

|                                                                      |           |
|----------------------------------------------------------------------|-----------|
| Table 6 – Sensitivities, duration of infectiousness -----            | 40        |
| S9.1.4 Change proportion of minimal “true minimal” -----             | 40        |
| Table 7 – Sensitivities, proportion of true minimal -----            | 40        |
| S9.1.5 Change assumption on persistent symptoms -----                | 41        |
| Table 8 – Sensitivities, unreported symptoms -----                   | 41        |
| S9.2 Cohort model-----                                               | 41        |
| S9.2.1 Parameter values-----                                         | 41        |
| Table 9 – Sensitivities, parameter choice in analysis -----          | 41        |
| S9.2.2 Treatment -----                                               | 42        |
| Table 10 – Sensitivities, effect of treatment -----                  | 42        |
| S9.2.3 Trajectories-----                                             | 42        |
| Table 11 – Sensitivities, undulation definition, months-----         | 42        |
| Table 12 – Sensitivities, undulation definition, state changes ----- | 43        |
| <b>References -----</b>                                              | <b>44</b> |

## S1 Disease model structure

Our model structure focuses on the spectrum of disease, with infection and progression from infection already assumed to have happened. We split the progression into three states, as shown in figure 1; minimal, subclinical, and clinical disease.

Minimal disease is the earliest stage of disease from infection, being non-infectious, but with pathological changes to the lung visible on, originally, chest x-ray but also other forms of chest imaging such as computed tomography (CT). Along with being the first stage of disease after infection, minimal is the final stage before recovery, with regression back to minimal possible within the spectrum framework, and then natural recovery from disease possible.

In the forward progression, the stage after minimal is subclinical. This is an infectious disease state, but without sufficient symptoms to present for screening. In other words, this is an infectious but asymptomatic state. Within the spectrum, there is progression to clinical disease (i.e. development of symptoms) and regression to minimal disease (i.e. becoming non-infectious) from subclinical disease.

Clinical disease, symptomatic and infectious, is the final disease state. This state can only be reached by passing through minimal and subclinical first. As with the other two states, there are two transition possibilities out of clinical disease, regression to subclinical disease (i.e. resolution of symptoms but remaining infectious), and death from TB.

In the model structure, there is possibility to both progress and regress, but in visualising the model, such as figure 1, arrows that point right indicate the disease progressing to a more severe state, and arrows that point left indicate the disease regressing to a less severe state.

| Disease State                     | Minimal                                                                      | Subclinical                                                                 | Clinical                                                |
|-----------------------------------|------------------------------------------------------------------------------|-----------------------------------------------------------------------------|---------------------------------------------------------|
| <b>Clinical description</b>       | Radiological changes attributable to TB but sputum negative (non-infectious) | Sputum positive TB disease that does not pass a symptom screen (infectious) | Symptomatic and sputum positive TB disease (infectious) |
| <b>Systematic review tests</b>    | Chest x-ray or fluoroscopy positive<br>Smear or culture negative             | Smear or culture positive<br>Symptom negative                               | Smear or culture positive<br>Symptom positive           |
| <b>Systematic review notation</b> | cxr.pos<br>micro.neg<br>symp.pos/neg/unk                                     | cxr.pos<br>micro.pos<br>symp.neg                                            | cxr.pos<br>micro.pos<br>symp.pos                        |

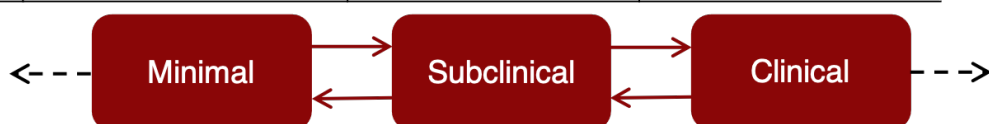

**Figure 1 - TB disease natural history model**

States and transitions in red are considered in the model fitting, with dashed parameters holding a fixed value and solid transitions being estimated from the data. Each state is defined by a clinical description and the tests that would have been used in clinical settings at the time our data was recorded with the notation used for data collection in table S4 described in the final row. The black dashed lines out from minimal and clinical are recovery and TB mortality respectively.

## S2 Open TB vs Clinical TB

In a systematic review, Tiemersma et al describe how study results were interpreted as having people with either smear negative or smear positive disease:<sup>1</sup>

*in studies where patients were described as having “open” tuberculosis or “bacillary tuberculosis” before 1930 (when culture became available) we assumed that these patients were smear-positive.*

This definition is maintained in the work of Ragonnet et al.<sup>2</sup>

As we were not attempting to stratify bacteriological status any further by smear status, we instead interpreted bacillary tuberculosis as simply bacteriologically positive. The definition of “open” tuberculosis was less clear cut, with different studies choosing different explanations.

Szucs, in 1926, defines open and closed tuberculosis based solely on the symptom status of the individual:<sup>3</sup>

*Among others, we classify tuberculous patients as open and closed cases, based on the presence or absence of expectoration.*

However, they point out that absence of symptoms does not indicate a negative bacteriological status, in essence diagnosing their patients with subclinical disease using more modern terminology.

*We succeeded in demonstrating the presence of tubercle bacilli in the spray of two of our recently admitted patients in the absence of any expectoration.*

Another study in 1947 provides a different definition for open and closed. Tattersall compares his work with that of Lindhardt in Denmark, stating that:<sup>4,5</sup>

*These results accord closely with Lindhardt's finding in Denmark during the same period, which enhances the value of comparison of the present series of sputum +ve cases with the results of the Danish survivals of open cases.*

This suggests that rather than open being equivalent to clinical and closed being equivalent to subclinical, open is actually all bacteriologically positive disease (i.e. subclinical and clinical).

Finally, Bland, in 1946 states that Illinois state defines that all cases that were bacteriologically positive must be defined as open TB, using the same definition as Tattersall.<sup>6</sup> However he also considers the possibility of infection from closed TB.

*All cases in which a positive sputum has been shown must by Illinois law be considered open for a period of at least three months and thereafter until three successive specimens of sputum, collected at intervals of one week, contain no tubercle bacilli... Although a so-called "closed" case is not as grave a source of infection as a frankly open one, it is more insidious.*

Our definition of clinical aligns closely with the National Tuberculosis Association's definition of "active" TB, as described in their diagnostic standards from 1940.<sup>7</sup> By this point there was less focus on open and closed definitions and more consideration of symptoms and bacteriology together:

*Symptoms unchanged, worse or less severe, but not completely abated. Lesions not completely healed or progressive according X-ray examination. Sputum almost always contains tubercle bacilli.*

Overall, the definitions of "open" tuberculosis and the final definition of "active" tuberculosis do not differ significantly, and again are not dissimilar to our definition of clinical disease. Therefore, where Ragonnet et al have provided a TB mortality rate for smear positive TB, we are instead using this number as the TB mortality rate from clinical TB disease.<sup>2</sup>

### **S3 Symptomatic Minimal**

Minimal disease was classified as when an individual had radiological changes attributable to TB but negative bacteriology, regardless of symptoms. Although progressing from a potentially symptomatic bacteriologically negative state to an asymptomatic bacteriologically positive seems unlikely, a number of sources suggested that there was no need to consider an alternative progression for symptomatic minimal.

Firstly, there is insufficient data to show an obvious split in progression between symptomatic and asymptomatic bacteriologically negative individuals (see figure 2), the

diagnostic standards from the 1940s placed significantly less weight on symptoms if they were not accompanied by a positive sputum, and the prevalence survey in Cambodia in 2002 found that symptoms in culture negative individuals were not associated with future bacteriological positivity.<sup>7,8</sup> We also know that TB symptoms are highly non-specific, and so there is no guarantee that symptoms occurring whilst an individual has minimal disease are actually caused by TB and not by something else.

Therefore, we have considered all bacteriologically negative individuals to be minimal, regardless of symptom status.

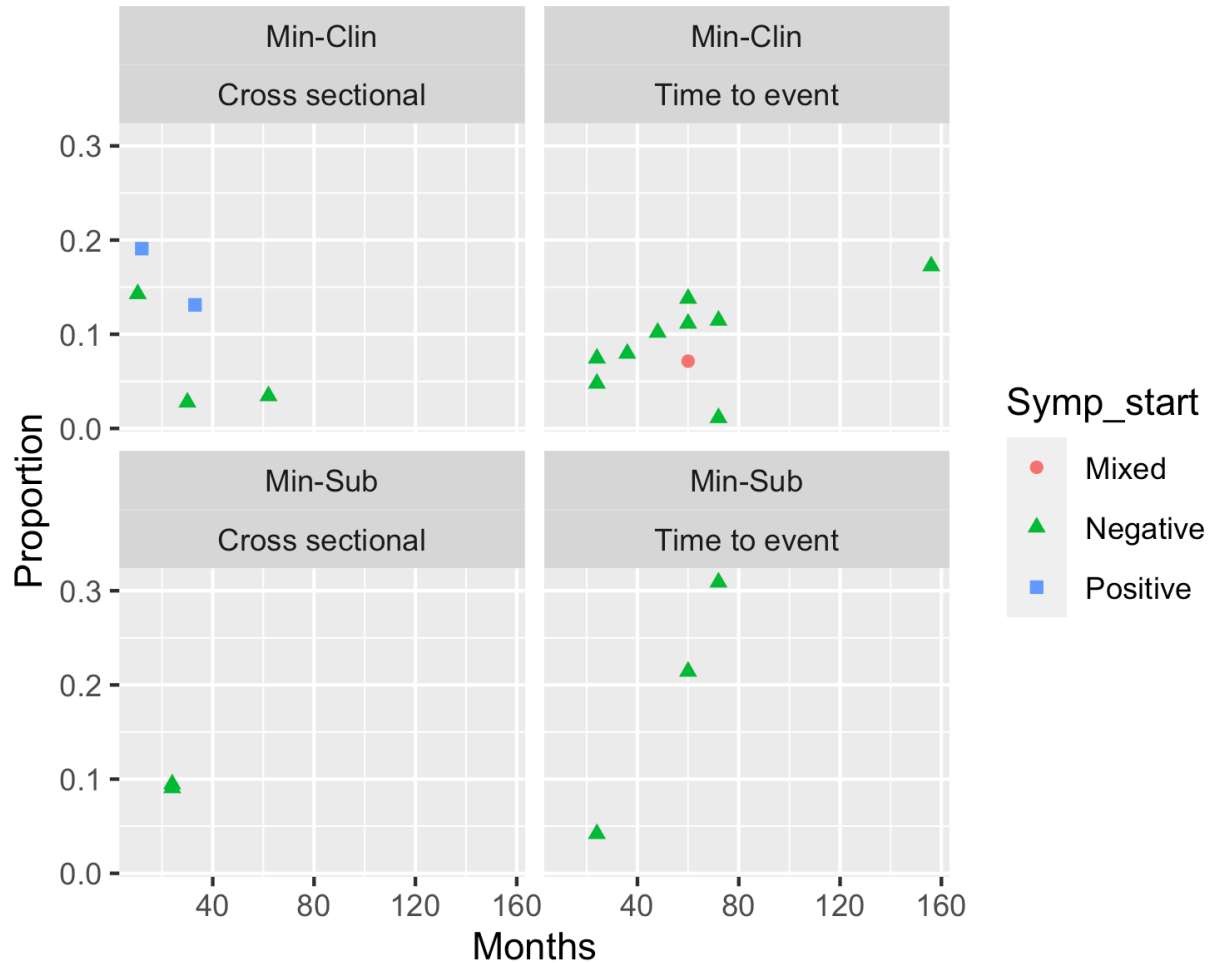

**Figure 2 – Progression rates from minimal disease**  
*The different progression rates for minimal disease, based on symptoms, transition, and record type*

## S4 Data inclusion and exclusion

### S4.1 Data types

As explained in the main text, there were two study types included. In table 1 we report the data types for each line of data, in column “Follow-up method”. There were 39 data points reported as time to event, and 18 reported as cross sectional.

### S4.2 Timings

For cross-sectional data, if an average follow-up time was given, that is the time used. Otherwise, if a minimum and maximum follow-up time was given, the times have been summed and halved to give the follow-up time used. For time-to-event data, the maximum follow-up time given was used. The times in table 1, column “Months of follow-up” reflect these choices.

### S4.3 Included data

All data that was included in the final data fit is in table 1.

#### **Table 1- Included data**

*A table on all the studies included, the model transitions they parameterise, and, where applicable, notes on why a certain decision has been taken. The number of repeats column reports the number of data points that a study provides within a single transition. This is then used to calculate the effective number of people transitioned and the effective cohort size (divides the true numbers which are then rounded to the nearest integer) to appropriately weight each data point so that each study is considered as one.*

| First Author | Ref | Study Continent | Year | Start states                        | End states                        | Number transitioned | Cohort size | Months of follow-up | Follow-up method | Model transition | Number of repeats | Effective number transitioned | Effective cohort size | Notes |
|--------------|-----|-----------------|------|-------------------------------------|-----------------------------------|---------------------|-------------|---------------------|------------------|------------------|-------------------|-------------------------------|-----------------------|-------|
| Downes       | 9   | North America   | 1935 | cxr.pos<br>micro.pops<br>sympt.pops | cxr.pos<br>micro.neg<br>sympt.neg | 27                  | 342         | 12.0                | time to event    | Clin-Min         | 5                 | 5                             | 68                    |       |
| Downes       | 9   | North America   | 1935 | cxr.pos<br>micro.pops<br>sympt.pops | cxr.pos<br>micro.neg<br>sympt.neg | 104                 | 342         | 24.0                | time to event    | Clin-Min         | 5                 | 21                            | 68                    |       |

|          |    |               |      |                                   |                                   |     |     |      |                 |          |   |    |     |                                               |
|----------|----|---------------|------|-----------------------------------|-----------------------------------|-----|-----|------|-----------------|----------|---|----|-----|-----------------------------------------------|
| Downes   | 9  | North America | 1935 | cxr.pos<br>micro.pos<br>sympt.pos | cxr.pos<br>micro.neg<br>sympt.neg | 140 | 342 | 36.0 | time to event   | Clin-Min | 5 | 28 | 68  |                                               |
| Downes   | 9  | North America | 1935 | cxr.pos<br>micro.pos<br>sympt.pos | cxr.pos<br>micro.neg<br>sympt.neg | 158 | 342 | 48.0 | time to event   | Clin-Min | 5 | 32 | 68  |                                               |
| Downes   | 9  | North America | 1935 | cxr.pos<br>micro.pos<br>sympt.pos | cxr.pos<br>micro.neg<br>sympt.neg | 171 | 342 | 60.0 | time to event   | Clin-Min | 5 | 34 | 68  |                                               |
| Beeuwkes | 10 | North America | 1938 | cxr.pos<br>micro.neg<br>sympt.neg | cxr.unk<br>micro.pos<br>sympt.pos | 16  | 122 | 33.0 | cross sectional | Min-Clin | 1 | 16 | 122 | merged 2 groups exhibiting same start and end |
| Beeuwkes | 10 | North America | 1938 | cxr.pos<br>micro.pos<br>sympt.pos | cxr.unk<br>micro.neg<br>sympt.unk | 10  | 28  | 33.0 | cross sectional | Clin-Min | 1 | 10 | 28  |                                               |
| Puffer   | 11 | North America | 1943 | cxr.pos<br>micro.neg<br>sympt.neg | cxr.pos<br>micro.pos<br>sympt.pos | 19  | 528 | 62.0 | cross sectional | Min-Clin | 1 | 19 | 528 | merged 2 groups exhibiting same start and end |

|               |        |               |      |                                   |                                   |    |     |      |                 |          |   |    |     |                                                                                    |
|---------------|--------|---------------|------|-----------------------------------|-----------------------------------|----|-----|------|-----------------|----------|---|----|-----|------------------------------------------------------------------------------------|
| Puffer        | 11     | North America | 1943 | cxr.pos<br>micro.pos<br>sympt.pos | cxr.pos<br>micro.neg<br>sympt.neg | 92 | 384 | 62.0 | cross sectional | Clin-Min | 1 | 92 | 384 |                                                                                    |
| Orrego Puelma | 12     | South America | 1945 | cxr.pos<br>micro.neg<br>sympt.unk | cxr.pos<br>micro.pos<br>sympt.unk | 18 | 67  | 24.0 | cross sectional | Min-Inf  | 1 | 18 | 67  |                                                                                    |
| Bobrowitz     | 13, 14 | North America | 1945 | cxr.pos<br>micro.neg<br>sympt.unk | cxr.pos<br>micro.pos<br>sympt.unk | 26 | 191 | 60.0 | cross sectional | Min-Inf  | 1 | 26 | 191 |                                                                                    |
| Lincoln       | 16, 17 | North America | 1947 | cxr.pos<br>micro.mix<br>sympt.unk | cxr.pos<br>micro.neg<br>sympt.unk | 45 | 134 | 24.0 | time to event   | Clin-Min | 6 | 8  | 22  | majority tested were micro pos and all reported as active based on NTA definitions |
| Lincoln       | 16, 17 | North America | 1947 | cxr.pos<br>micro.mix<br>sympt.unk | cxr.pos<br>micro.neg<br>sympt.unk | 71 | 134 | 36.0 | time to event   | Clin-Min | 6 | 12 | 22  | majority tested were micro pos and all reported                                    |



|         |        |               |       |                                          |                                       |    |     |      |                     |              |   |    |    |                                                                                                                            |
|---------|--------|---------------|-------|------------------------------------------|---------------------------------------|----|-----|------|---------------------|--------------|---|----|----|----------------------------------------------------------------------------------------------------------------------------|
| Lincoln | 16, 17 | North America | 19 47 | cxr.pos<br>micro.m<br>x<br>sympt.un<br>k | cxr.pos<br>micro.neg<br>sympt.un<br>k | 80 | 134 | 48.0 | time<br>to<br>event | Clin-<br>Min | 6 | 13 | 22 | majorit<br>y tested<br>were<br>micro<br>pos and<br>all<br>reporte<br>d as<br>active<br>baseed<br>on NTA<br>definiti<br>ons |
| Lincoln | 16, 17 | North America | 19 47 | cxr.pos<br>micro.m<br>x<br>sympt.un<br>k | cxr.pos<br>micro.neg<br>sympt.un<br>k | 83 | 134 | 60.0 | time<br>to<br>event | Clin-<br>Min | 6 | 14 | 22 | majorit<br>y tested<br>were<br>micro<br>pos and<br>all<br>reporte<br>d as<br>active<br>baseed<br>on NTA<br>definiti<br>ons |
| Lincoln | 16, 17 | North America | 19 47 | cxr.pos<br>micro.m<br>x                  | cxr.pos<br>micro.neg<br>sympt.un<br>k | 86 | 134 | 72.0 | time<br>to<br>event | Clin-<br>Min | 6 | 14 | 22 | majorit<br>y tested<br>were<br>micro                                                                                       |

|           |           |                      |          |                                           |                                               |    |     |      |                        |              |   |    |    |                                                                                                                            |
|-----------|-----------|----------------------|----------|-------------------------------------------|-----------------------------------------------|----|-----|------|------------------------|--------------|---|----|----|----------------------------------------------------------------------------------------------------------------------------|
|           |           |                      |          | sympt.un<br>k                             |                                               |    |     |      |                        |              |   |    |    | pos and<br>all<br>reporte<br>d as<br>active<br>baseed<br>on NTA<br>definiti<br>ons                                         |
| Lincoln   | 16,<br>17 | North<br>Americ<br>a | 19<br>47 | cxr.pos<br>micro.mi<br>x<br>sympt.un<br>k | cxr.pos<br>micro.neg<br>sympt.un<br>k         | 87 | 134 | 84.0 | time<br>to<br>event    | Clin-<br>Min | 6 | 15 | 22 | majorit<br>y tested<br>were<br>micro<br>pos and<br>all<br>reporte<br>d as<br>active<br>baseed<br>on NTA<br>definiti<br>ons |
| Childress | 15        | North<br>Americ<br>a | 19<br>47 | cxr.pos<br>micro.ne<br>g<br>sympt.ne<br>g | cxr.pos<br>micro.pos<br>sympt.po<br>s         | 5  | 35  | 10.4 | cross<br>sectio<br>nal | Min-<br>Clin | 1 | 5  | 35 |                                                                                                                            |
| Lincoln   | 16,<br>17 | North<br>Americ<br>a | 19<br>47 | cxr.pos<br>micro.ne<br>g<br>sympt.un<br>k | cxr.pos<br>micro.rel<br>apse<br>sympt.un<br>k | 15 | 314 | 24.0 | time<br>to<br>event    | Min-<br>Clin | 5 | 3  | 63 | majorit<br>y tested<br>were<br>micro<br>pos and<br>all<br>reporte<br>d as<br>active                                        |

|         |        |               |       |                                        |                                           |    |     |       |               |          |   |   |    | based on NTA definitions |
|---------|--------|---------------|-------|----------------------------------------|-------------------------------------------|----|-----|-------|---------------|----------|---|---|----|--------------------------|
| Lincoln | 16, 17 | North America | 19 47 | cxr.pos<br>micro.netg<br>sympt.unknown | cxr.pos<br>micro.relapse<br>sympt.unknown | 25 | 314 | 36.0  | time to event | Min-Clin | 5 | 5 | 63 |                          |
| Lincoln | 16, 17 | North America | 19 47 | cxr.pos<br>micro.netg<br>sympt.unknown | cxr.pos<br>micro.relapse<br>sympt.unknown | 32 | 314 | 48.0  | time to event | Min-Clin | 5 | 6 | 63 |                          |
| Lincoln | 16, 17 | North America | 19 47 | cxr.pos<br>micro.netg<br>sympt.unknown | cxr.pos<br>micro.relapse<br>sympt.unknown | 35 | 314 | 60.0  | time to event | Min-Clin | 5 | 7 | 63 |                          |
| Lincoln | 16, 17 | North America | 19 47 | cxr.pos<br>micro.netg<br>sympt.unknown | cxr.pos<br>micro.relapse<br>sympt.unknown | 36 | 314 | 72.0  | time to event | Min-Clin | 5 | 7 | 63 |                          |
| Alling  | 16, 19 | North America | 19 48 | cxr.pos<br>micro.netg<br>sympt.unknown | cxr.pos<br>micro.relapse<br>sympt.unknown | 8  | 58  | 60.0  | time to event | Min-Clin | 2 | 4 | 29 |                          |
| Alling  | 16, 19 | North America | 19 48 | cxr.pos<br>micro.netg<br>sympt.unknown | cxr.pos<br>micro.relapse<br>sympt.unknown | 10 | 58  | 156.0 | time to event | Min-Clin | 2 | 5 | 29 |                          |

|                                               |           |        |          |                                       |                                       |    |     |      |                        |              |   |    |     |                                                                  |
|-----------------------------------------------|-----------|--------|----------|---------------------------------------|---------------------------------------|----|-----|------|------------------------|--------------|---|----|-----|------------------------------------------------------------------|
| Marshall                                      | 18        | Europe | 19<br>48 | cxr.pos<br>micro.pos<br>sympt.pos     | cxr.pos<br>micro.neg<br>sympt.un<br>k | 1  | 52  | 6.0  | cross<br>sectio<br>nal | Clin-<br>Min | 1 | 1  | 52  |                                                                  |
| Borgen                                        | 20,<br>21 | Europe | 19<br>49 | cxr.pos<br>micro.neg<br>sympt.pos     | cxr.pos<br>micro.pos<br>sympt.pos     | 4  | 144 | 30.0 | cross<br>sectio<br>nal | Min-<br>Clin | 1 | 4  | 144 | merged<br>2<br>groups<br>exhibiti<br>ng same<br>start<br>and end |
| Manser                                        | 22        | Europe | 19<br>51 | cxr.pos<br>micro.pos<br>sympt.un<br>k | cxr.pos<br>micro.neg<br>sympt.un<br>k | 15 | 40  | 6.0  | cross<br>sectio<br>nal | Clin-<br>Min | 1 | 15 | 40  |                                                                  |
| Breu                                          | 23        | Europe | 19<br>52 | cxr.pos<br>micro.neg<br>sympt.un<br>k | cxr.pos<br>micro.pos<br>sympt.un<br>k | 48 | 904 | 25.5 | cross<br>sectio<br>nal | Min-<br>Inf  | 1 | 48 | 904 |                                                                  |
| Sikand                                        | 24        | Asia   | 19<br>58 | cxr.pos<br>micro.neg<br>sympt.un<br>k | cxr.pos<br>micro.pos<br>sympt.un<br>k | 38 | 319 | 12.0 | time<br>to<br>event    | Min-<br>Inf  | 1 | 38 | 319 |                                                                  |
| Tubercul<br>osis<br>Society<br>of<br>Scotland | 25,<br>26 | Europe | 19<br>59 | cxr.pos<br>micro.neg<br>sympt.neg     | cxr.pos<br>micro.pos<br>sympt.un<br>k | 9  | 95  | 24.0 | cross<br>sectio<br>nal | Min-<br>Sub  | 1 | 9  | 95  | assume<br>lack of<br>sysmpt<br>om<br>persists                    |

|                                 |       |      |      |                                      |                                 |    |     |      |                 |          |   |    |     |
|---------------------------------|-------|------|------|--------------------------------------|---------------------------------|----|-----|------|-----------------|----------|---|----|-----|
| Frimodt-Moller                  | 27    | Asia | 1961 | cxr.pos<br>micro.negative<br>symptom | cxr.pos<br>micro.pos<br>symptom | 11 | 86  | 12.0 | time to event   | Min-Inf  | 3 | 4  | 29  |
| Frimodt-Moller                  | 27    | Asia | 1961 | cxr.pos<br>micro.negative<br>symptom | cxr.pos<br>micro.pos<br>symptom | 18 | 86  | 24.0 | time to event   | Min-Inf  | 3 | 6  | 29  |
| Frimodt-Moller                  | 27    | Asia | 1961 | cxr.pos<br>micro.negative<br>symptom | cxr.pos<br>micro.pos<br>symptom | 25 | 86  | 36.0 | time to event   | Min-Inf  | 3 | 8  | 29  |
| Pamra                           | 37    | Asia | 1968 | cxr.pos<br>micro.negative<br>symptom | cxr.pos<br>micro.pos<br>symptom | 2  | 178 | 72.0 | time to event   | Min-Clin | 1 | 2  | 178 |
| Pamra                           | 37    | Asia | 1968 | cxr.pos<br>micro.negative<br>symptom | cxr.pos<br>micro.pos<br>symptom | 55 | 178 | 72.0 | time to event   | Min-Sub  | 1 | 55 | 178 |
| National Tuberculosis Institute | 28-36 | Asia | 1968 | cxr.pos<br>micro.negative<br>symptom | cxr.pos<br>micro.pos<br>symptom | 23 | 329 | 18.0 | cross sectional | Min-Inf  | 2 | 12 | 165 |
| National Tuberculosis Institute | 28-36 | Asia | 1968 | cxr.pos<br>micro.negative            | cxr.pos<br>micro.pos            | 36 | 271 | 60.0 | cross sectional | Min-Inf  | 2 | 18 | 136 |

|                                          |           |      |          |                                             |                                       |    |     |      |                        |              |   |    |     |                                   |  |  |
|------------------------------------------|-----------|------|----------|---------------------------------------------|---------------------------------------|----|-----|------|------------------------|--------------|---|----|-----|-----------------------------------|--|--|
|                                          |           |      |          | sympt.un<br>k                               | sympt.un<br>k                         |    |     |      |                        |              |   |    |     |                                   |  |  |
| National<br>Tubercul<br>osis<br>Insitute | 28-<br>36 | Asia | 19<br>68 | cxr.pos<br>micro.po<br>s<br>sympt.un<br>k   | cxr.pos<br>micro.neg<br>sympt.un<br>k | 86 | 269 | 18.0 | cross<br>sectio<br>nal | Inf-<br>Min  | 2 | 43 | 135 |                                   |  |  |
| National<br>Tubercul<br>osis<br>Insitute | 28-<br>36 | Asia | 19<br>68 | cxr.pos<br>micro.po<br>s<br>sympt.un<br>k   | cxr.pos<br>micro.neg<br>sympt.un<br>k | 70 | 178 | 36.0 | cross<br>sectio<br>nal | Inf-<br>Min  | 2 | 35 | 89  |                                   |  |  |
| Gothi                                    | 30        | Asia | 19<br>72 | cxr.pos<br>micro.ne<br>g<br>sympt.un<br>k   | cxr.pos<br>micro.pos<br>sympt.un<br>k | 11 | 53  | 3.0  | time<br>to<br>event    | Min-<br>Inf  | 2 | 6  | 27  |                                   |  |  |
| Gothi                                    | 30        | Asia | 19<br>72 | cxr.pos<br>micro.ne<br>g<br>sympt.un<br>k   | cxr.pos<br>micro.pos<br>sympt.un<br>k | 15 | 53  | 6.0  | time<br>to<br>event    | Min-<br>Inf  | 2 | 8  | 27  |                                   |  |  |
| Aneja                                    | 38        | Asia | 19<br>77 | cxr.pos<br>micro.ne<br>g<br>sympt.po<br>s   | cxr.pos<br>micro.pos<br>sympt.un<br>k | 21 | 110 | 12.0 | cross<br>sectio<br>nal | Min-<br>Clin | 1 | 21 | 110 | assume<br>sympto<br>ms<br>persist |  |  |
| Hong<br>Kong<br>Chest<br>Service         | 39-<br>42 | Asia | 19<br>81 | cxr.pos<br>micro.ne<br>g<br>sympt.mi<br>xed | cxr.pos<br>micro.pos<br>sympt.un<br>k | 40 | 176 | 3.0  | time<br>to<br>event    | Min-<br>Inf  | 8 | 5  | 22  |                                   |  |  |

|                         |       |      |      |                                     |                                       |    |     |      |                     |             |   |   |    |
|-------------------------|-------|------|------|-------------------------------------|---------------------------------------|----|-----|------|---------------------|-------------|---|---|----|
| Hong Kong Chest Service | 39-42 | Asia | 1981 | cxr.pos<br>micro.net<br>sympt.mixed | cxr.pos<br>micro.pos<br>sympt.un<br>k | 49 | 176 | 6.0  | time<br>to<br>event | Min-<br>Inf | 8 | 6 | 22 |
| Hong Kong Chest Service | 39-42 | Asia | 1981 | cxr.pos<br>micro.net<br>sympt.mixed | cxr.pos<br>micro.pos<br>sympt.un<br>k | 61 | 176 | 12.0 | time<br>to<br>event | Min-<br>Inf | 8 | 8 | 22 |
| Hong Kong Chest Service | 39-42 | Asia | 1981 | cxr.pos<br>micro.net<br>sympt.mixed | cxr.pos<br>micro.pos<br>sympt.un<br>k | 67 | 176 | 18.0 | time<br>to<br>event | Min-<br>Inf | 8 | 8 | 22 |
| Hong Kong Chest Service | 39-42 | Asia | 1981 | cxr.pos<br>micro.net<br>sympt.mixed | cxr.pos<br>micro.pos<br>sympt.un<br>k | 69 | 176 | 24.0 | time<br>to<br>event | Min-<br>Inf | 8 | 9 | 22 |
| Hong Kong Chest Service | 39-42 | Asia | 1981 | cxr.pos<br>micro.net<br>sympt.mixed | cxr.pos<br>micro.pos<br>sympt.un<br>k | 70 | 176 | 30.0 | time<br>to<br>event | Min-<br>Inf | 8 | 9 | 22 |
| Hong Kong Chest Service | 39-42 | Asia | 1981 | cxr.pos<br>micro.net<br>sympt.mixed | cxr.pos<br>micro.pos<br>sympt.un<br>k | 71 | 176 | 36.0 | time<br>to<br>event | Min-<br>Inf | 8 | 9 | 22 |
| Hong Kong Chest Service | 39-42 | Asia | 1981 | cxr.pos<br>micro.net                | cxr.pos<br>micro.pos                  | 71 | 176 | 60.0 | time<br>to<br>event | Min-<br>Inf | 8 | 9 | 22 |

|           |    |        |      |                                                       |                                                        |    |     |      |                     |              |   |    |     |                                                                                                |
|-----------|----|--------|------|-------------------------------------------------------|--------------------------------------------------------|----|-----|------|---------------------|--------------|---|----|-----|------------------------------------------------------------------------------------------------|
| Cowie     | 43 | Africa | 1984 | sympt.mixed<br>cxr.pos<br>micro.netg<br>sympt.un<br>k | sympt.un<br>k<br>cxr.pos<br>micro.pos<br>sympt.un<br>k | 88 | 152 | 58.0 | time<br>to<br>event | Min-<br>Inf  | 1 | 88 | 152 |                                                                                                |
| Norregard | 45 | Europe | 1985 | cxr.pos<br>micro.netg<br>sympt.mixed                  | cxr.pos<br>micro.pos<br>sympt.netg                     | 6  | 28  | 60.0 | time<br>to<br>event | Min-<br>Sub  | 1 | 6  | 28  |                                                                                                |
| Norregard | 45 | Europe | 1985 | cxr.pos<br>micro.netg<br>sympt.mixed                  | cxr.pos<br>micro.pos<br>sympt.poss                     | 2  | 28  | 60.0 | time<br>to<br>event | Min-<br>Clin | 1 | 2  | 28  |                                                                                                |
| Anastastu | 44 | Europe | 1985 | cxr.pos<br>micro.netg<br>sympt.netg                   | cxr.pos<br>micro.pos<br>sympt.un<br>k                  | 6  | 143 | 24.0 | time<br>to<br>event | Min-<br>Sub  | 1 | 6  | 143 | assume<br>lack of<br>symptom<br>persists                                                       |
| Okada     | 8  | Asia   | 2004 | cxr.pos<br>micro.netg<br>sympt.netg                   | cxr.pos<br>micro.pos<br>sympt.un<br>k                  | 28 | 309 | 24.0 | cross<br>sectional  | Min-<br>Sub  | 1 | 28 | 309 | split<br>group<br>by<br>symptoms<br>dependent<br>on<br>proportion<br>found<br>in<br>prevalence |



|       |   |      |      |                                   |                                   |    |     |      |               |          |   |    |     |                                                                                                                              |
|-------|---|------|------|-----------------------------------|-----------------------------------|----|-----|------|---------------|----------|---|----|-----|------------------------------------------------------------------------------------------------------------------------------|
| Okada | 8 | Asia | 2004 | cxr.pos<br>micro.neg<br>sympt.neg | cxr.pos<br>micro.pos<br>sympt.pos | 23 | 309 | 24.0 | time to event | Min-Clin | 1 | 23 | 309 | nce survey added in 39% (18) of those picked up at 2 year follow-up using known subclinical proportion at prevalence surveys |
|-------|---|------|------|-----------------------------------|-----------------------------------|----|-----|------|---------------|----------|---|----|-----|------------------------------------------------------------------------------------------------------------------------------|

#### S4.4 Excluded data

As can be seen in table 2, some of the data that was originally extracted for the wider review was not eligible for this work. In total 20 cohorts were excluded, from from 10 different studies. Most (NA) rows of data that were excluded, had an initial state with x-ray negative, and one study was observing a cohort who, although already x-ray positive, were not expected to progress to infectious TB disease. Others were excluded for too much uncertainty within the start and end states, or changes only within states, such as change in x-ray severity, but no change in bacteriological or symptom status. These reasonings are laid out in table 2

**Table 2 - Excluded data**

*A table on all the studies excluded and reasons why they have not been included*

| Author   | Ref | Year | Continent     | Start state                       | End state                         | Number transitioned | Cohort size | Follow up time | Notes on exclusion           |
|----------|-----|------|---------------|-----------------------------------|-----------------------------------|---------------------|-------------|----------------|------------------------------|
| Beeuwkes | 10  | 1938 | North America | cxr.neg<br>micro.neg<br>sympt.neg | cxr.unk<br>micro.pos<br>sympt.pos | 1                   | 784         | 33             | initial state x-ray negative |

|                                |       |      |               |                                   |                                   |    |       |    |                                 |
|--------------------------------|-------|------|---------------|-----------------------------------|-----------------------------------|----|-------|----|---------------------------------|
| Beeuwkes                       | 10    | 1938 | North America | cxr.neg<br>micro.neg<br>sympt.neg | cxr.unk<br>micro.neg<br>sympt.pos | 3  | 784   | 33 | initial state x-ray<br>negative |
| National Tuberculosis Insitute | 28-36 | 1968 | Asia          | cxr.neg<br>micro.neg<br>sympt.unk | cxr.pos<br>micro.pos<br>sympt.unk | 44 | 31490 | 18 | initial state x-ray<br>negative |
| National Tuberculosis Insitute | 28-36 | 1968 | Asia          | cxr.neg<br>micro.neg<br>sympt.unk | cxr.pos<br>micro.pos<br>sympt.unk | 99 | 17936 | 60 | initial state x-ray<br>negative |
| Borgen                         | 20,21 | 1949 | Europe        | cxr.neg<br>micro.unk<br>sympt.unk | cxr.pos<br>micro.pos<br>sympt.pos | 4  | 6684  | 30 | initial state x-ray<br>negative |
| Madsen                         | 46    | 1940 | Europe        | cxr.neg<br>micro.unk<br>sympt.neg | cxr.pos<br>micro.mix<br>sympt.unk | 4  | 2071  | 12 | initial state x-ray<br>negative |
| Madsen                         | 46    | 1940 | Europe        | cxr.neg<br>micro.unk<br>sympt.neg | cxr.pos<br>micro.mix<br>sympt.unk | 7  | 2071  | 24 | initial state x-ray<br>negative |
| Madsen                         | 46    | 1940 | Europe        | cxr.neg<br>micro.unk<br>sympt.neg | cxr.pos<br>micro.mix<br>sympt.unk | 10 | 2071  | 36 | initial state x-ray<br>negative |
| Madsen                         | 46    | 1940 | Europe        | cxr.neg<br>micro.unk<br>sympt.neg | cxr.pos<br>micro.mix<br>sympt.unk | 11 | 2071  | 48 | initial state x-ray<br>negative |
| Madsen                         | 46    | 1940 | Europe        | cxr.neg<br>micro.unk<br>sympt.neg | cxr.pos<br>micro.mix<br>sympt.unk | 16 | 2071  | 60 | initial state x-ray<br>negative |
| Madsen                         | 46    | 1940 | Europe        | cxr.neg<br>micro.unk<br>sympt.neg | cxr.pos<br>micro.mix<br>sympt.unk | 17 | 2071  | 72 | initial state x-ray<br>negative |
| Okada                          | 8     | 2004 | Asia          | cxr.neg                           | cxr.pos                           | 32 | 21580 | 24 | initial state x-ray<br>negative |

|                                                                            |       |      |        |                                   |                                   |     |        |    |                                                                                     |
|----------------------------------------------------------------------------|-------|------|--------|-----------------------------------|-----------------------------------|-----|--------|----|-------------------------------------------------------------------------------------|
| Okada                                                                      | 8     | 2004 | Asia   | micro.neg<br>sympt.neg<br>cxr.pos | micro.pos<br>sympt.unk<br>cxr.neg | 26  | 309    | 24 | ends outside disease                                                                |
| International Union<br>Against Tuberculosis<br>Committee on<br>Prophylaxis | 47    | 1982 | Europe | micro.neg<br>sympt.neg<br>cxr.pos | micro.neg<br>sympt.unk<br>cxr.pos | 97  | 6990   | 60 | cohort not expected to<br>progress - effectively<br>initial state x-ray<br>negative |
| Sikand                                                                     | 24    | 1958 | Asia   | micro.unk<br>sympt.unk<br>cxr.neg | micro.pos<br>sympt.unk<br>cxr.pos | 89  | 11268  | 43 | initial state x-ray<br>negative                                                     |
| Sikand                                                                     | 24    | 1958 | Asia   | micro.unk<br>sympt.unk<br>cxr.neg | micro.neg<br>sympt.unk<br>cxr.pos | 251 | 11268  | 43 | initial state x-ray<br>negative                                                     |
| Groth-Petersen                                                             | 48,49 | 1952 | Europe | micro.unk<br>sympt.unk<br>cxr.neg | micro.mix<br>sympt.unk<br>cxr.pos | 59  | 45953  | 24 | initial state x-ray<br>negative                                                     |
| Groth-Petersen                                                             | 48,49 | 1952 | Europe | micro.unk<br>sympt.unk<br>cxr.neg | micro.mix<br>sympt.unk<br>cxr.pos | 108 | 45953  | 48 | initial state x-ray<br>negative                                                     |
| Groth-Petersen                                                             | 48,49 | 1952 | Europe | micro.unk<br>sympt.unk<br>cxr.neg | micro.mix<br>sympt.unk<br>cxr.pos | 64  | 116639 | 24 | initial state x-ray<br>negative                                                     |
| Groth-Petersen                                                             | 48,49 | 1952 | Europe | micro.unk<br>sympt.unk<br>cxr.neg | micro.mix<br>sympt.unk<br>cxr.pos | 147 | 116639 | 48 | initial state x-ray<br>negative                                                     |
| Groth-Petersen                                                             | 48,49 | 1952 | Europe | micro.unk<br>sympt.unk<br>cxr.neg | micro.mix<br>sympt.unk<br>cxr.pos | 73  | 103373 | 48 | initial state x-ray<br>negative                                                     |
| Groth-Petersen                                                             | 48,49 | 1952 | Europe | micro.unk<br>cxr.neg              | micro.mix<br>cxr.pos              | 35  | 69607  | 48 | initial state x-ray<br>negative                                                     |

|                |       |      |        |                                   |                                   |     |       |    |                                 |
|----------------|-------|------|--------|-----------------------------------|-----------------------------------|-----|-------|----|---------------------------------|
| Groth-Petersen | 48,49 | 1952 | Europe | sympt.unk<br>cxr.pos<br>micro.unk | sympt.unk<br>cxr.pos<br>micro.mix | 46  | 2877  | 48 | too much uncertainty            |
| Groth-Petersen | 48,49 | 1952 | Europe | sympt.unk<br>cxr.pos<br>micro.unk | sympt.unk<br>cxr.pos<br>micro.mix | 64  | 9693  | 48 | too much uncertainty            |
| Groth-Petersen | 48,49 | 1952 | Europe | sympt.unk<br>cxr.pos<br>micro.unk | sympt.unk<br>cxr.pos<br>micro.mix | 43  | 11366 | 48 | too much uncertainty            |
| Groth-Petersen | 48,49 | 1952 | Europe | sympt.unk<br>cxr.pos<br>micro.unk | sympt.unk<br>cxr.pos<br>micro.mix | 45  | 12400 | 48 | too much uncertainty            |
| Styblo         | 50    | 1965 | Europe | sympt.unk<br>cxr.neg<br>micro.neg | sympt.unk<br>cxr.unk<br>micro.pos | 241 | 73000 | 30 | initial state x-ray<br>negative |
| Rubinshteyn    | 51    | 1940 | Russia | sympt.neg                         | sympt.unk                         | NA  | NA    | NA | initial state x-ray<br>negative |

## S5 Fitting process

The equations to define the model system are:

$$\begin{aligned}\frac{dM}{dt} &= -m_s * M + s_m * S - r * M \\ \frac{dS}{dt} &= m_s * M - s_m * S - s_c * S + c_s * C \\ \frac{dC}{dt} &= s_c * S - c_s * C - d * C\end{aligned}$$

where:

- $M$ ,  $S$ , and  $C$  are the states for minimal, subclinical, and clinical respectively
- $m_s$ ,  $s_m$ ,  $s_c$ , and  $c_s$  are transitions between the states, where the first letter is the start state and the second letter is the end state
- $r$  is recovery from minimal disease
- $d$  is death from clinical disease (there is no other death included in the model)

As the data described how a cohort changed over time, and described only one outcome, the fitting process used a model system for each of the transitions and data types, totalling 16 different versions of the model system. Full code will be available on GitHub.

We used uniform priors for the four estimated parameters, all with a range of 0 to 12, where 12 would be equivalent to changing state once a month. During the fitting process, potential parameters are trialled within this range. Figure 3 shows the different parameter values that were accepted over the 10,000 iterations of the model fit.

These accepted parameters in turn, inform figure 4, which shows the correlation between two parameters. It also shows the overall distribution of the accepted parameters. We see a strong positive correlation between the parameters that control transition between minimal and subclinical; as one transition increases, the other also has to increase to prevent there being excess people in one state and too few in another. We also see this with the parameters that control transition between subclinical and clinical.

The rest of the pairings have slightly weaker, negative correlations. This is clearest with the subclinical to minimal and subclinical to clinical pairing, as if one increases, the other has to decrease to make sure that there are still sufficient individuals in subclinical to fit the data.

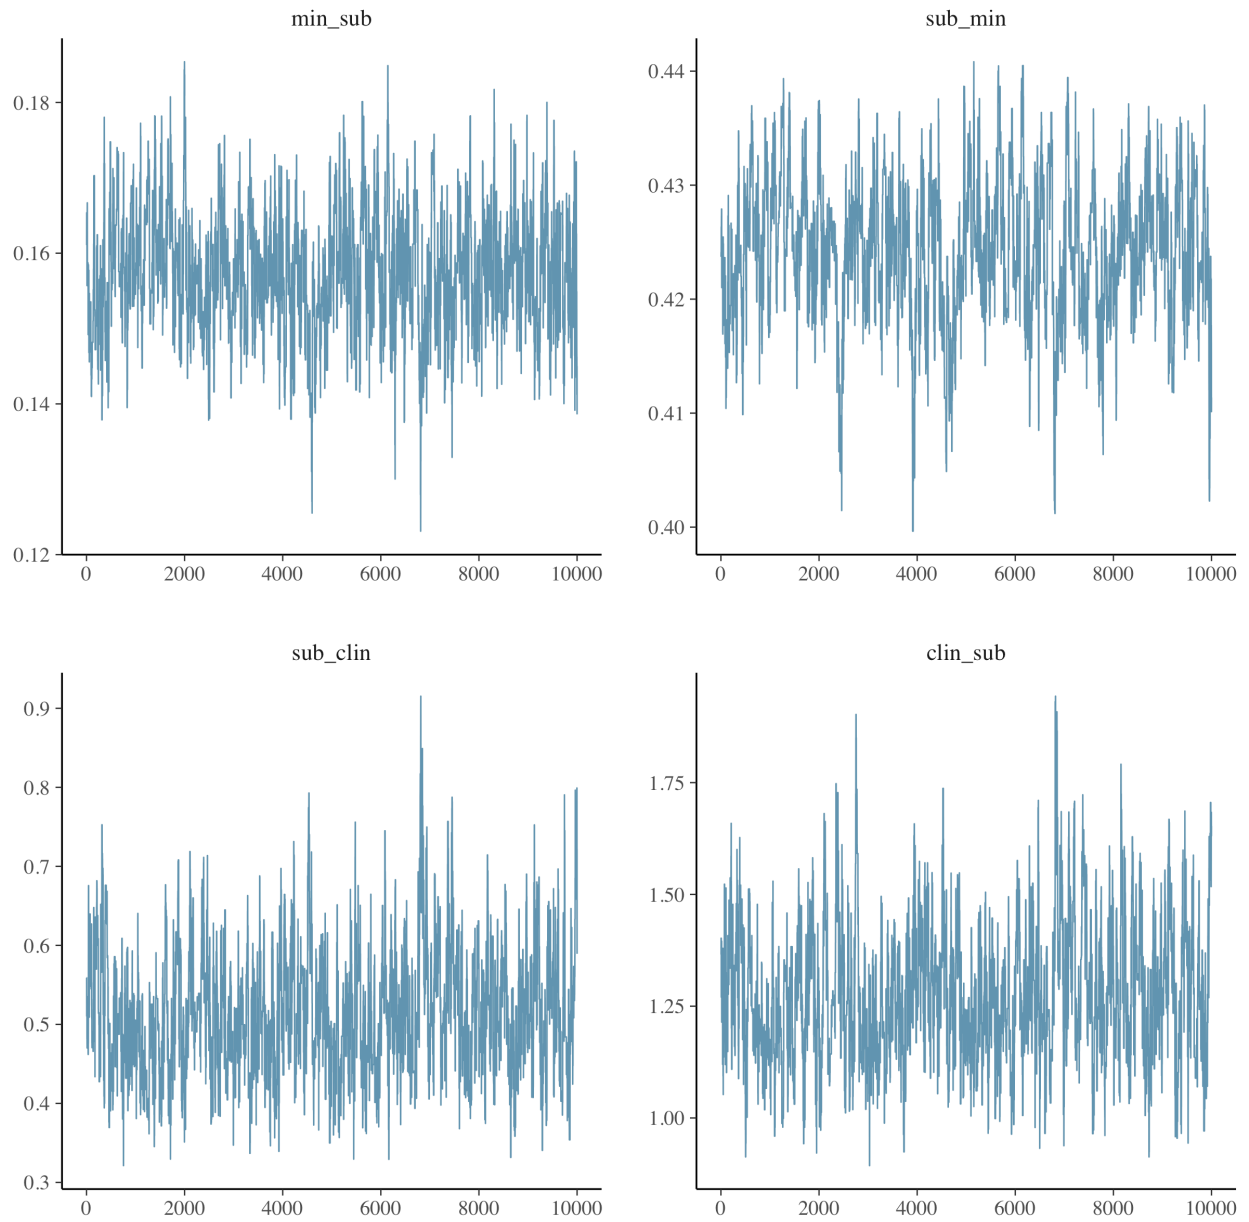

**Figure 3 - Trace plots**  
*The traces of the accepted parameter range from the fitting process*

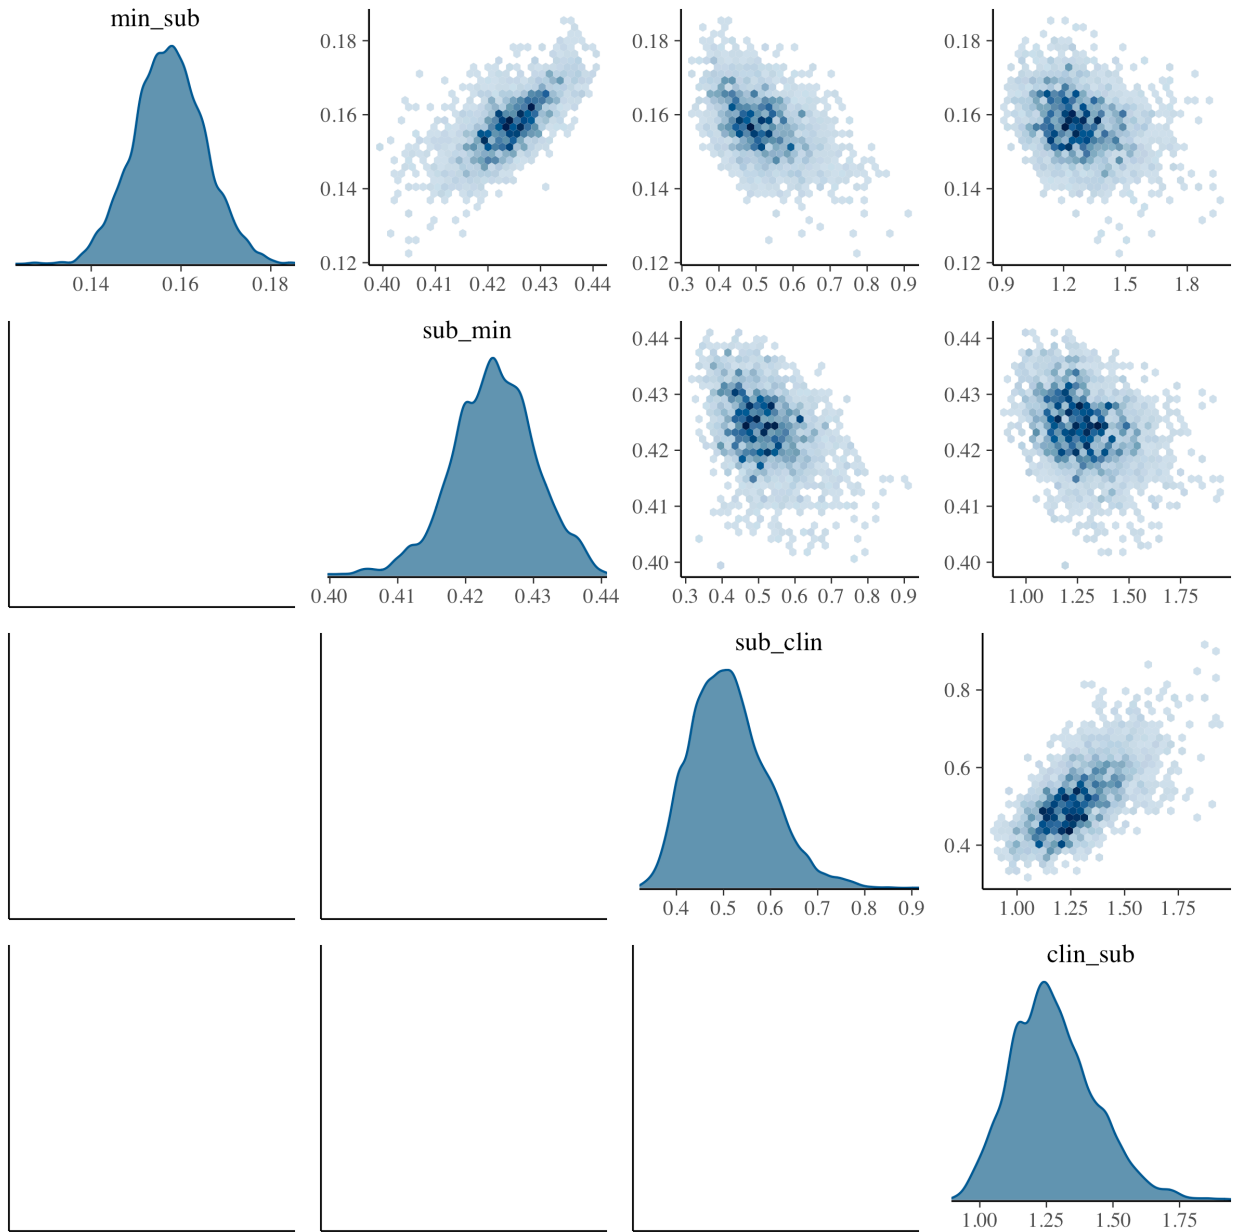

**Figure 4 – Correlation plots**

*The distributions of and correlations between the accepted parameters from the fitting process*

### S5.1 Weighting

When calculating the likelihood, larger studies were weighted by the original cohort size to reflect the increased confidence that such studies provide. Thus larger cohorts have a heavier weighting and constrain the model more.

In order to prevent a single study with multiple observations being over-represented in the fit of a transition, we down-weighted both the sample size and the number of people transitioning by the number of repeated observations. This maintains the observed proportion to transition whilst reducing confidence and thus importance given to each

individual data point within the study. This is shown in table 1, with the number of repeats and the re-calculated effective cohort size and number transitioning. This ensures that the proportion remains the same, but less weight is given to each individual data point.

### S5.2 Recovery from Minimal

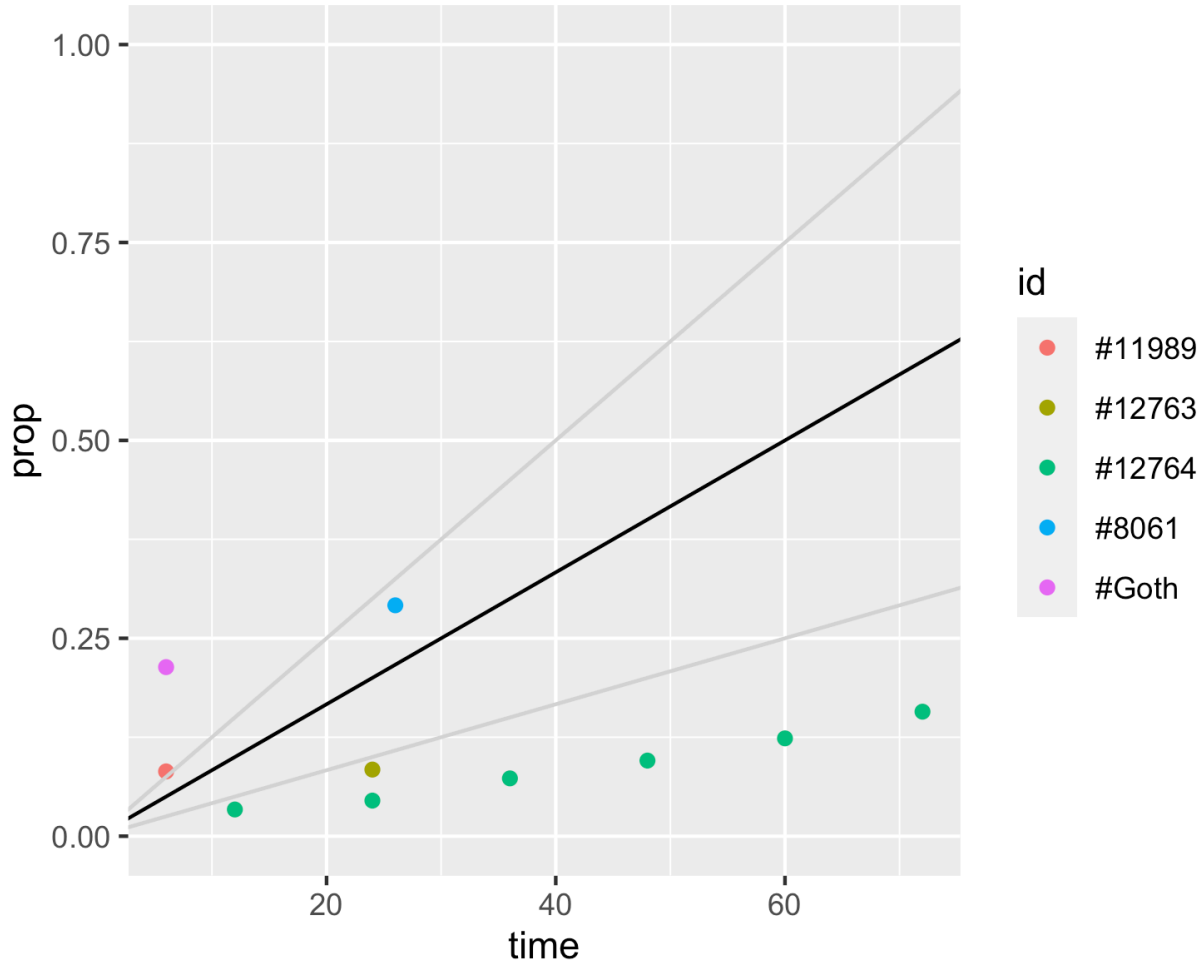

**Figure 5 – Recovery from minimal**  
*The 5 studies that informed the rate of recovery from minimal*

The data informing the rate of recovery from minimal come from papers found during the systematic review, although not all the studies have been included in the rest of the analysis as they did not provide the data required within the three disease states. Recovery is defined as a change from a positive x-ray to a negative x-ray. There are 5 studies that were included, one of which was a time-to-event study, the remainder are cross sectional. Figure 5 shows these points alongside three lines of fit - the best line at 0.1/yr, and two sensitivity lines at 0.05 and 0.15/yr, all three of which have been recorded in table 5. As the data are not entirely consistent, we have included a third sensitivity analysis where we excluded recovery entirely.



### S5.3 Duration of disease

Tiemersma et al estimated the mean duration of disease from a study conducted in Bangalore in the 1960s by the National Tuberculosis Institute.<sup>1,28</sup> The main result was that the mean duration of infectious disease was approximately 3 years, and given the distribution, the median duration of disease is approximately 2 years.

### S5.4 True Minimals

Determining who truly has TB when the only test is an x-ray is difficult, however, using tuberculin skin test (TST) as a proxy for determining whether a positive x-ray is a result of TB infection progressing to disease, we can estimate the proportion of people classed as minimal that are actually minimal. These papers were not selected systematically but span a range of time and location. Table 3 shows each of the studies, the number of people who were found to be x-ray positive in the study, and then the number of those who were also TST negative.

**Table 3 – True minimal**

*The different studies that contributed towards the decision to reduce the proportion of people with positive x-rays that were considered to be truly minimal*

| Author                                | xray_pos | tst_neg |
|---------------------------------------|----------|---------|
| Groth-Petersen, 1959                  | 37494    | 6097    |
| Roelsgaard, 1964                      | 2857     | 772     |
| Roelsgaard, 1961                      | 559      | 169     |
| Scheel, 1937                          | 255      | 54      |
| National Tuberculosis Institute, 1974 | 3761     | 1848    |

Applying a meta analysis to this, we find that the fixed effects result is 20% of x-ray positives are not caused by TB, and the random effects suggests 28%, as can be seen in figure 6. Therefore throughout this paper we have assumed that 25% of all x-ray positives are non-TB, and thus reduced every cohort that starts in minimal accordingly.

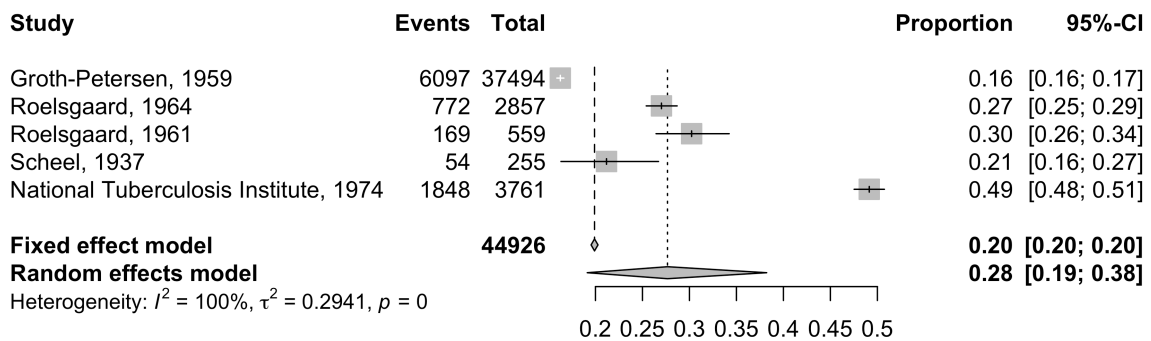

**Figure 6 – Meta analysis on true minimal**

*The results of a meta-analysis on the proportion of those with positive x-rays who also test tst negative, as a proxy for the proportion of positive x-rays that are not caused by TB*

To check this assumption, we have tested this with 0% and 40% of x-ray positives being non-TB, as can be seen in table 7.

## S6 Disease pathways

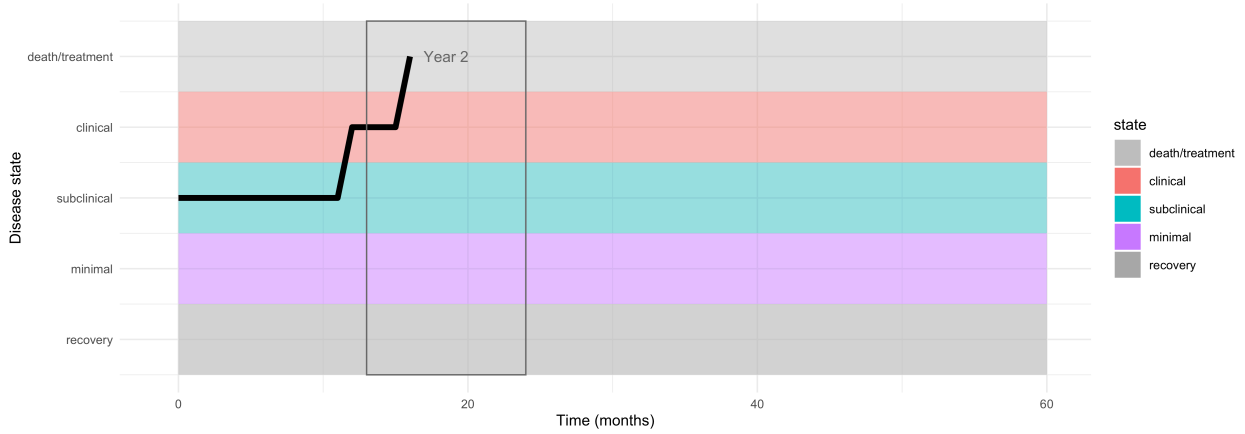

**Figure 7 – Trajectories, TB death**

*An example trajectory where the individual dies from TB. In this case, the death happens in year 2*

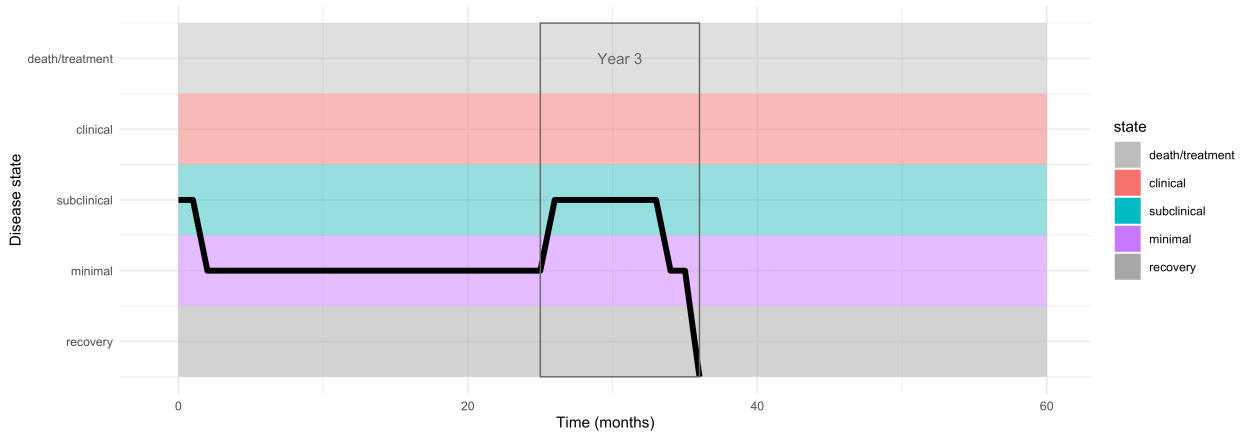

**Figure 8 – Trajectories, TB recovery**

*An example trajectory where the individual recovers from TB. In this case, the individual spent the first 2 years having regressed to minimal, then progresses to subclinical in the third year before regressing quickly to recovery*

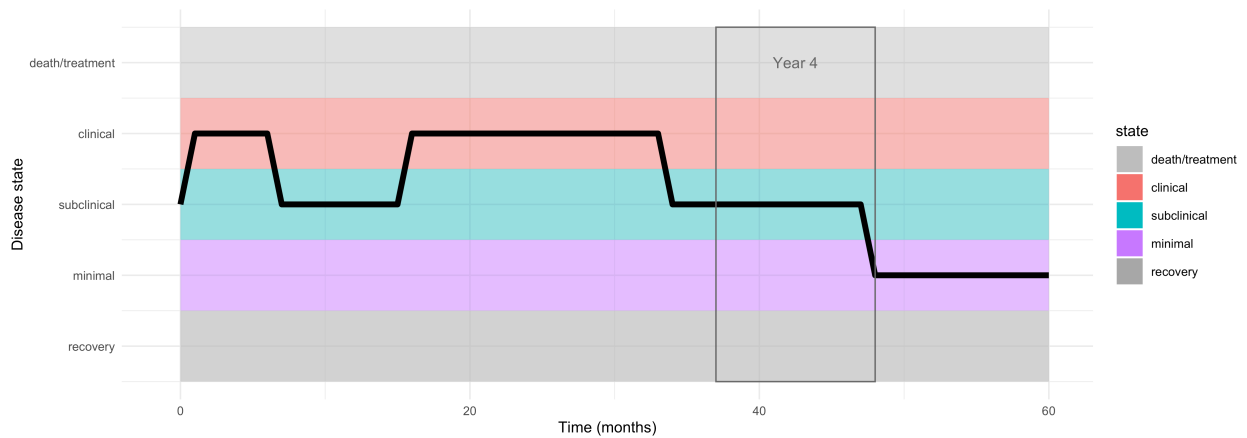

**Figure 9 – Trajectories, subclinical**

An example trajectory of subclinical in the 4th year. The previous years have time in both clinical and subclinical and year 5 is entirely in minimal, however, as the majority of time ( $\geq 9$  months) in year 4 and there are fewer than three state changes, the 4th year is defined as subclinical

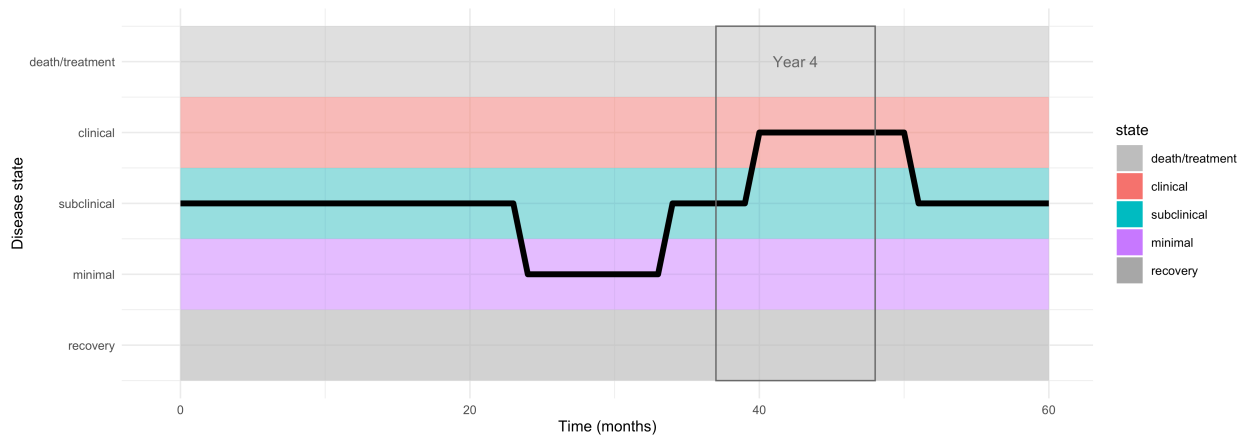

**Figure 10 – Trajectories, clinical**

An example trajectory of clinical in the 4th year. The previous years have time in both minimal and subclinical and year 5 is mainly subclinical. As the majority of time ( $\geq 9$  months) in year 4 is clinical and there are fewer than three state changes, the 4th year is defined as clinical

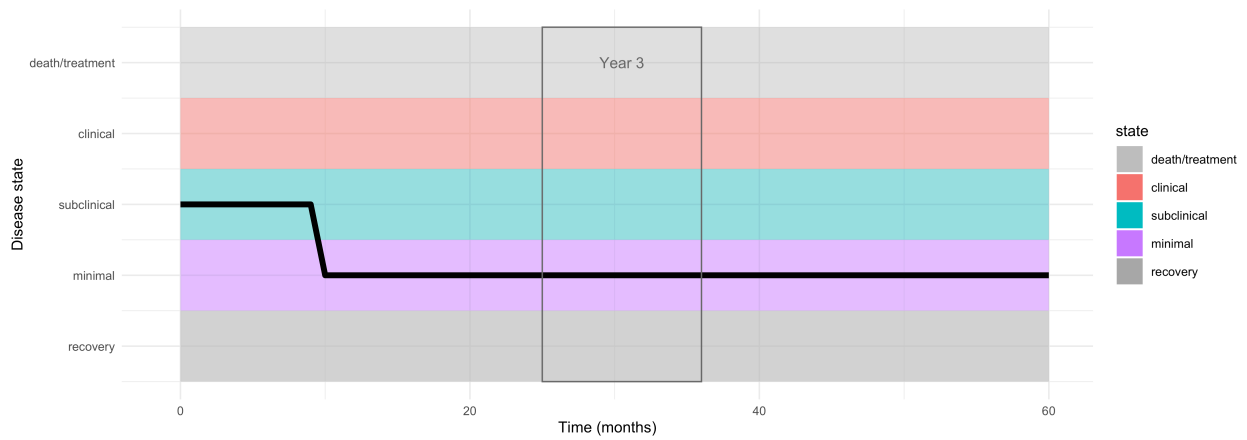

**Figure 11 – Trajectories, minimal**

*An example trajectory of minimal in the 3rd year. Other than the first year, with time in subclinical, the remaining years are also all minimal*

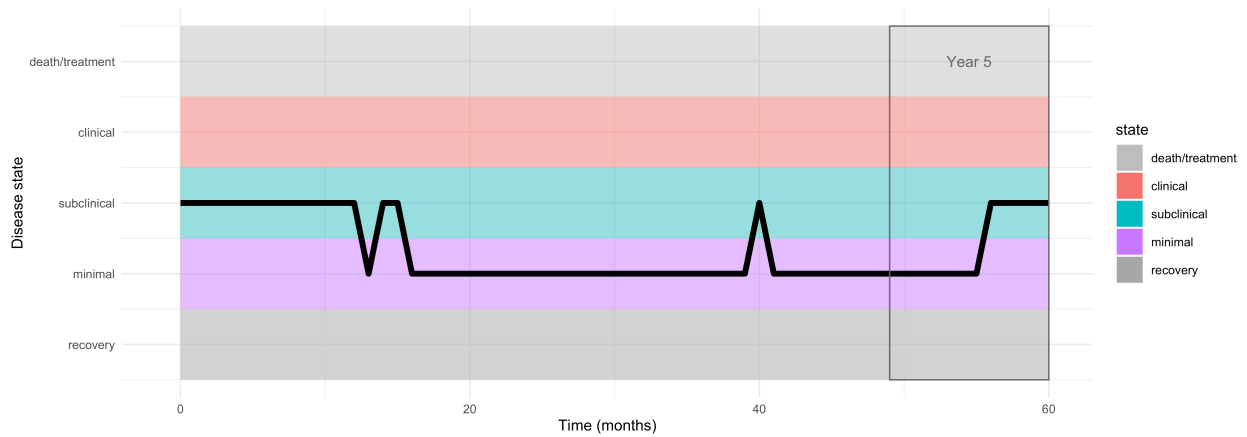

**Figure 12 – Trajectories, undulating 1**

*An example trajectory of undulating disease in the 5th year. There are 2 disease states in the 5th year, with neither lasting for 9 months. The majority of the remainder of this trajectory is in minimal*

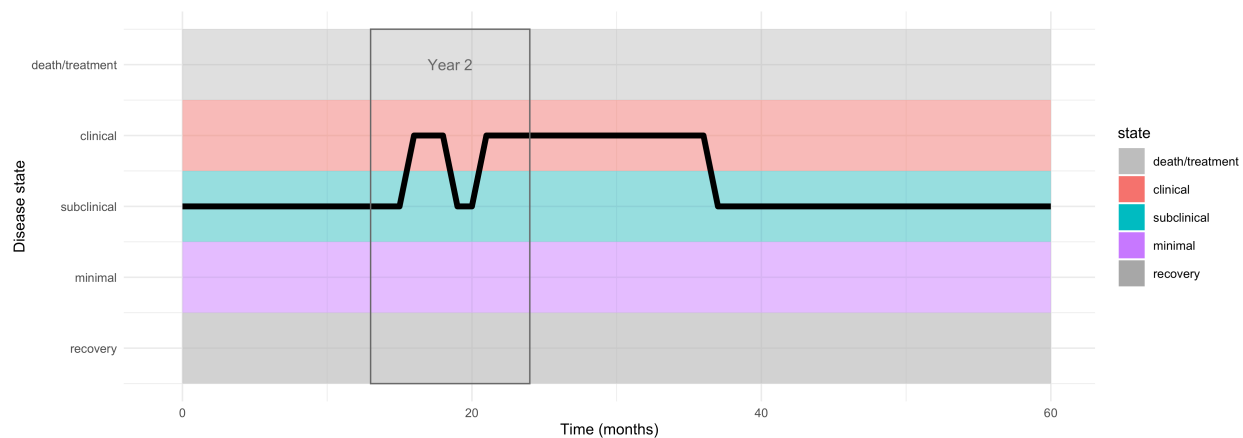

**Figure 13 – Trajectories, undulating 2**

*An example trajectory of undulating disease in the second year, with three state changes and neither state lasting for a total of 9 months.*

## S7 Duration of symptoms

Duration of symptoms can be split into three categories; duration before death, duration before regression to subclinical, and when applicable, duration before treatment. These three have not shown a significant difference in our analysis, but of note is the highly skewed distribution that we observe. Of those who become clinical, the minimum time spent clinical is one month (as that is the time step in the model), but a small proportion of individuals have persistent symptoms for a long time

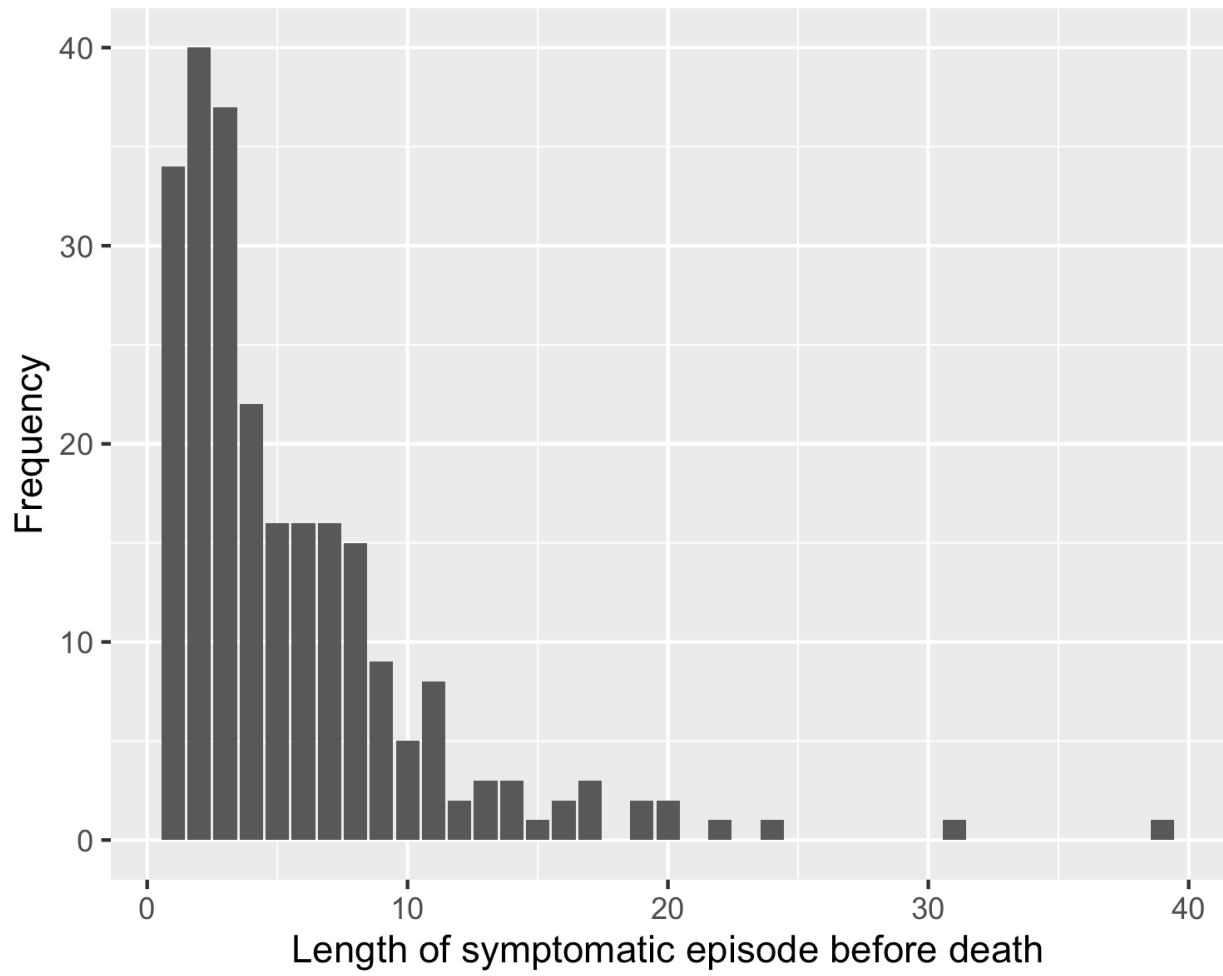

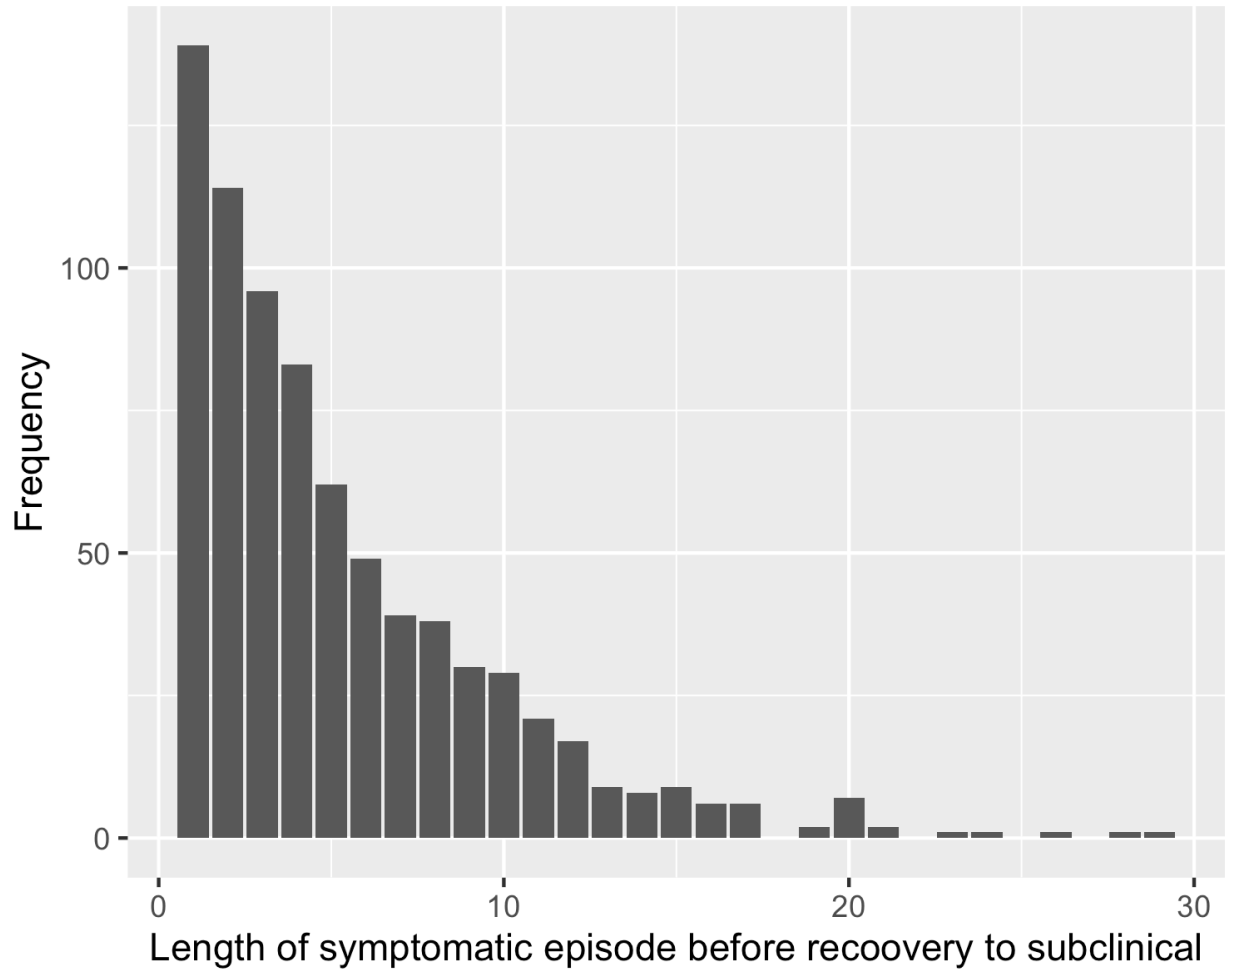

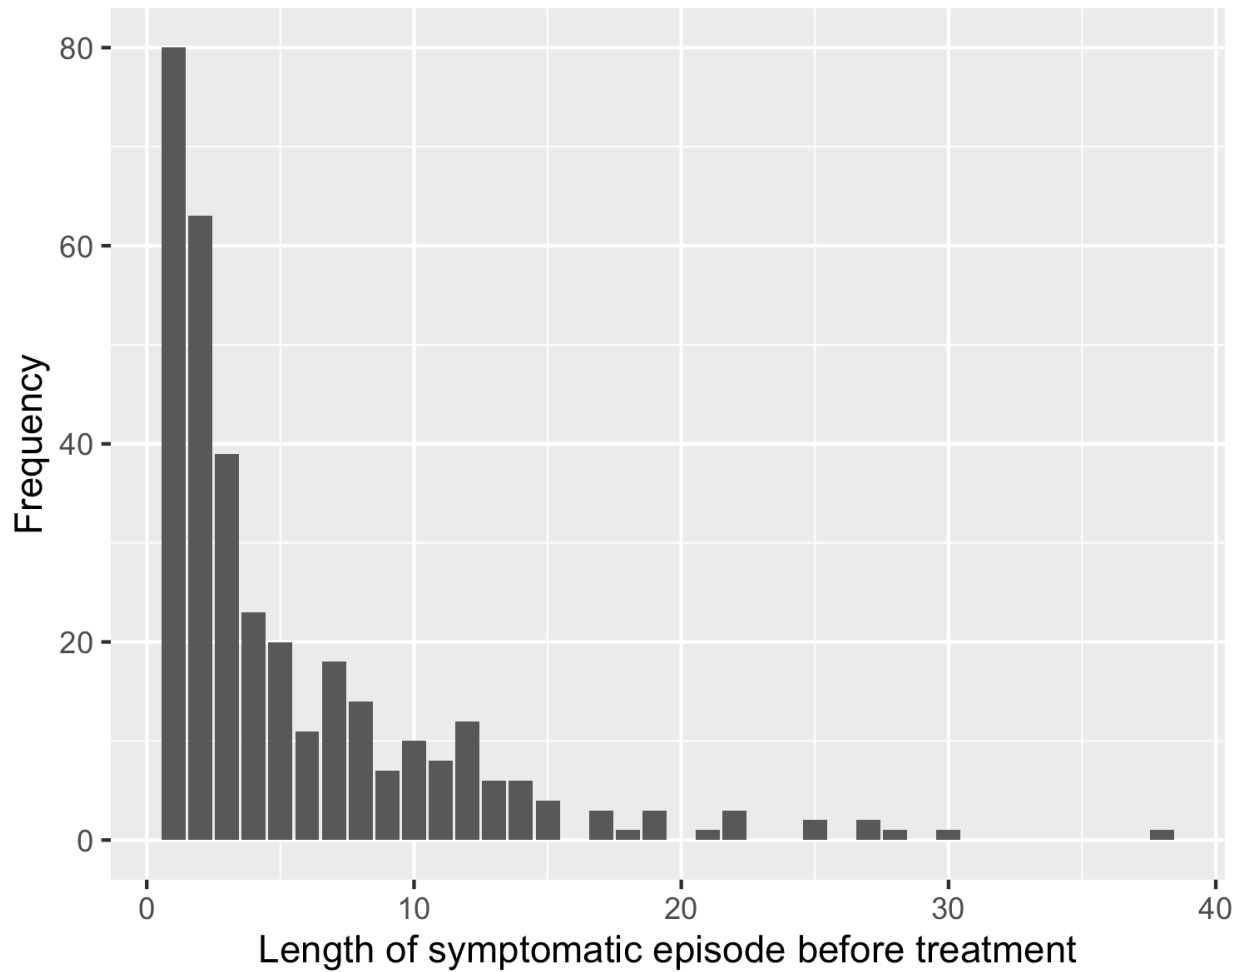

## S8 Additional results

Here we consider the median duration of disease and the proportion of people in each state at a given time. We can see that including treatment decreases the duration of disease and decreases the proportion clinical. When including minimal disease in the duration, we see that duration increases significantly, showing the importance of considering all those who are at risk of progressing to infectious disease. In the following figures, the top row is the number of people in all disease states (minimal, subclinical and clinical) over time, and the bottom row is the number of people in infectious disease states (subclinical and clinical).



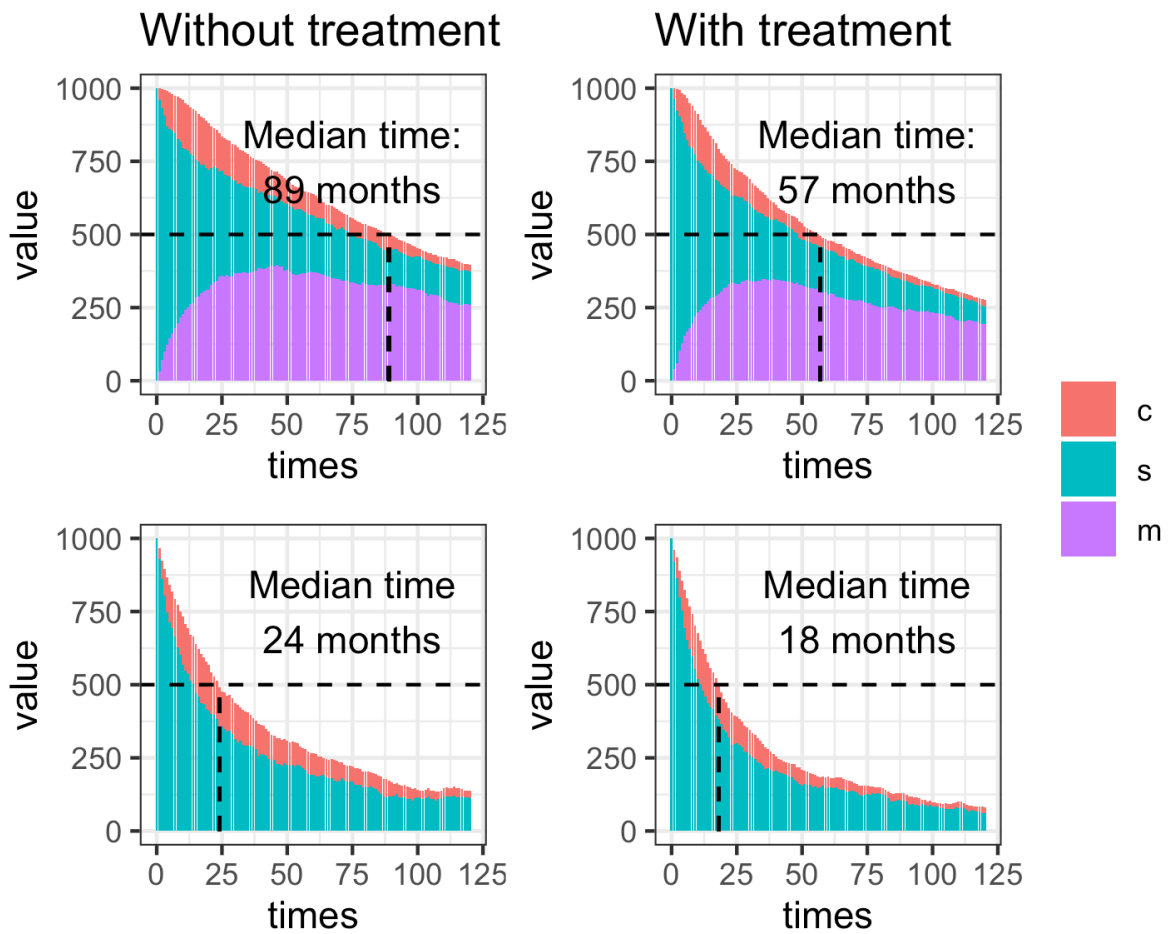

**Figure 14 - Duration from subclinical disease**

Median duration of infectious and all disease with and without treatment, starting with a cohort of subclinical individuals

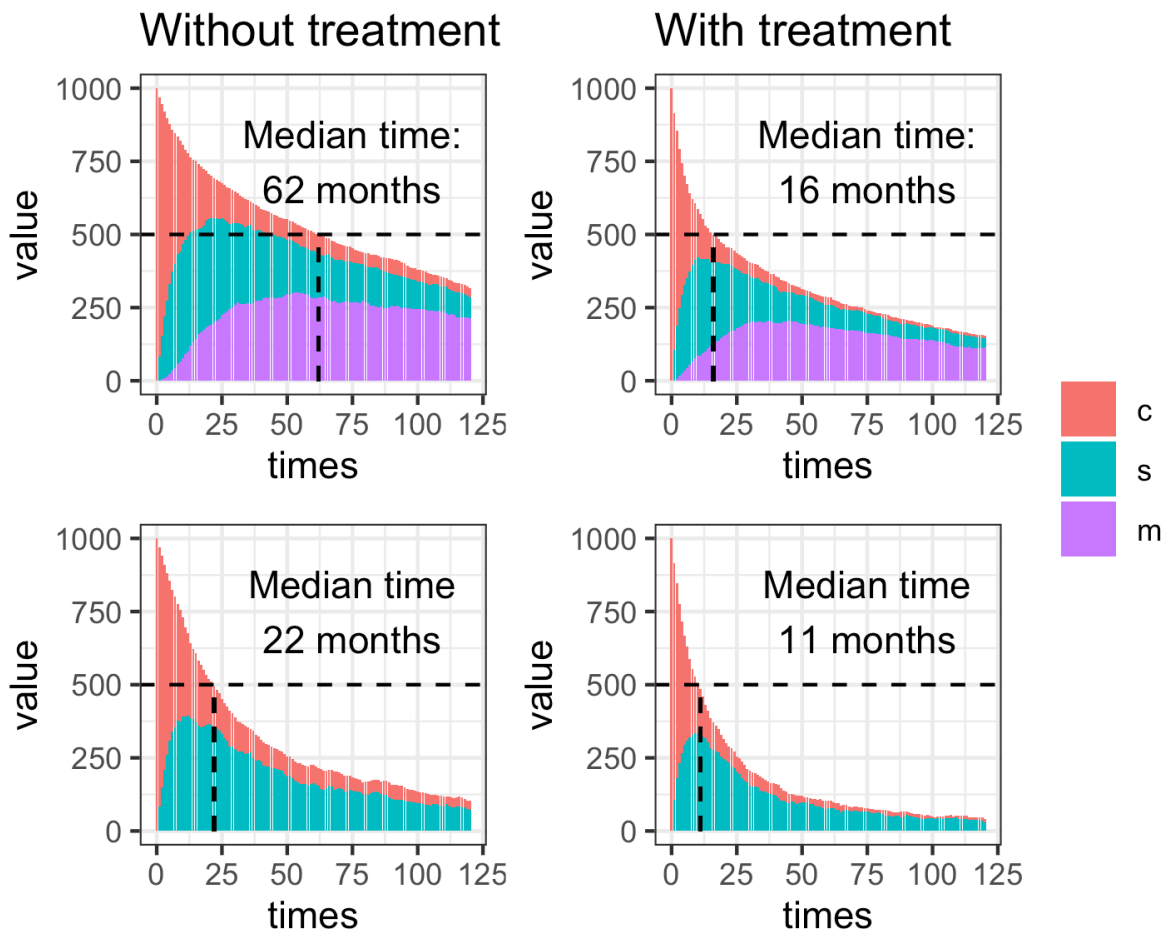

**Figure 15 – Duration from clinical disease**

Median duration of infectious and all disease with and without treatment, starting with a cohort of clinical individuals

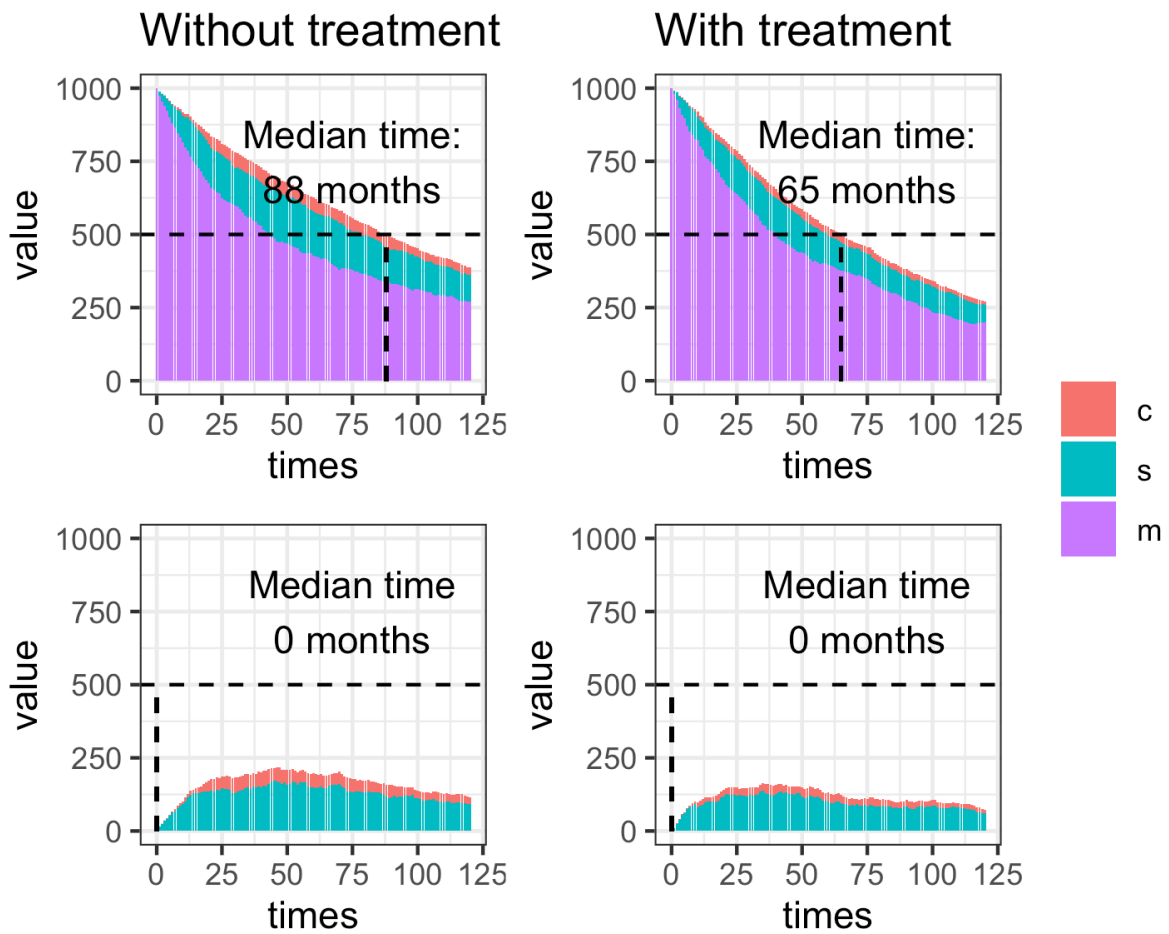

**Figure 16 – Duration from minimal disease**

Median duration of infectious and all disease with and without treatment, starting with a cohort of minimal individuals

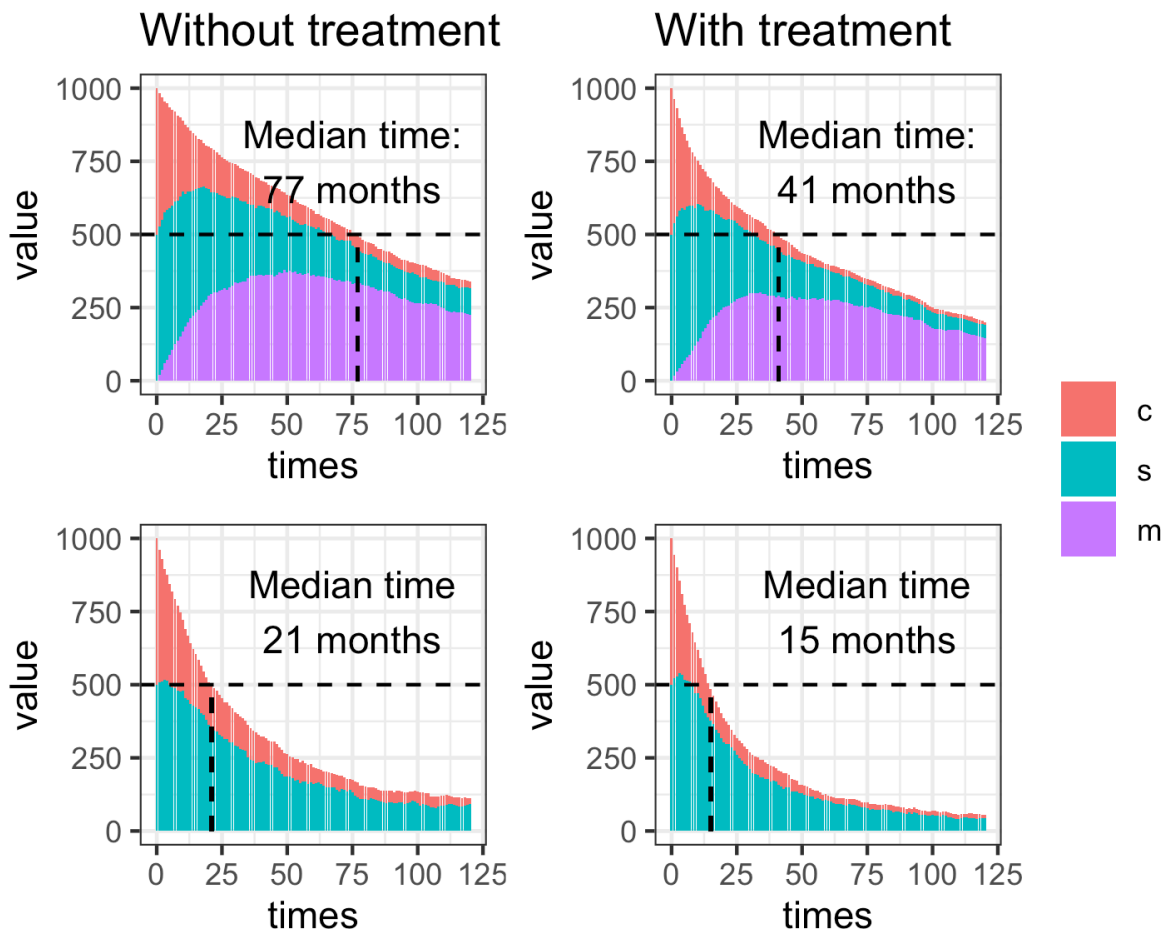

**Figure 17 – Duration from clinical/subclinical even split**  
 Median duration of infectious and all disease with and without treatment, starting with a cohort of half clinical and half subclinical individuals

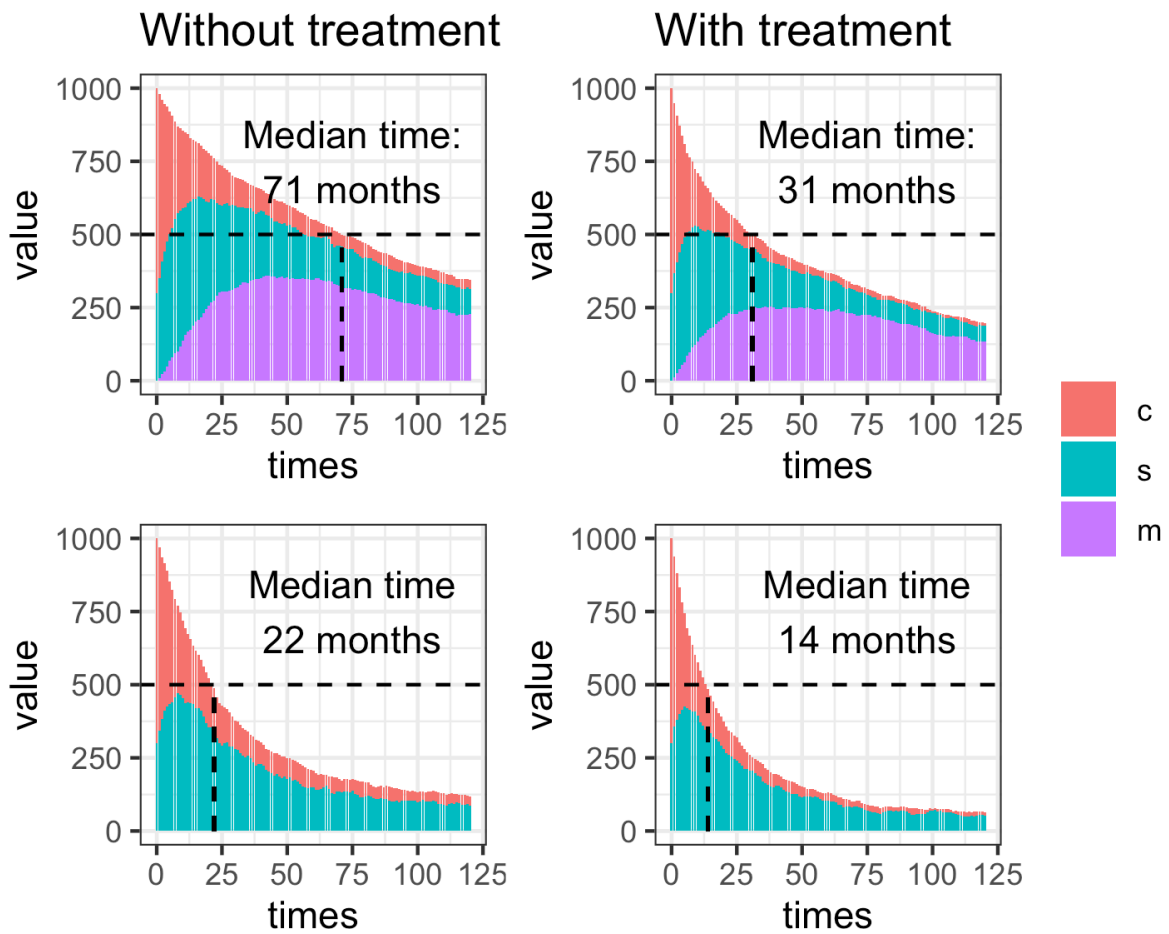

**Figure 18 – Duration from clinical/subclinical 70/30 split**

Median duration of infectious and all disease with and without treatment, starting with a cohort of 70% clinical and 30% subclinical individuals

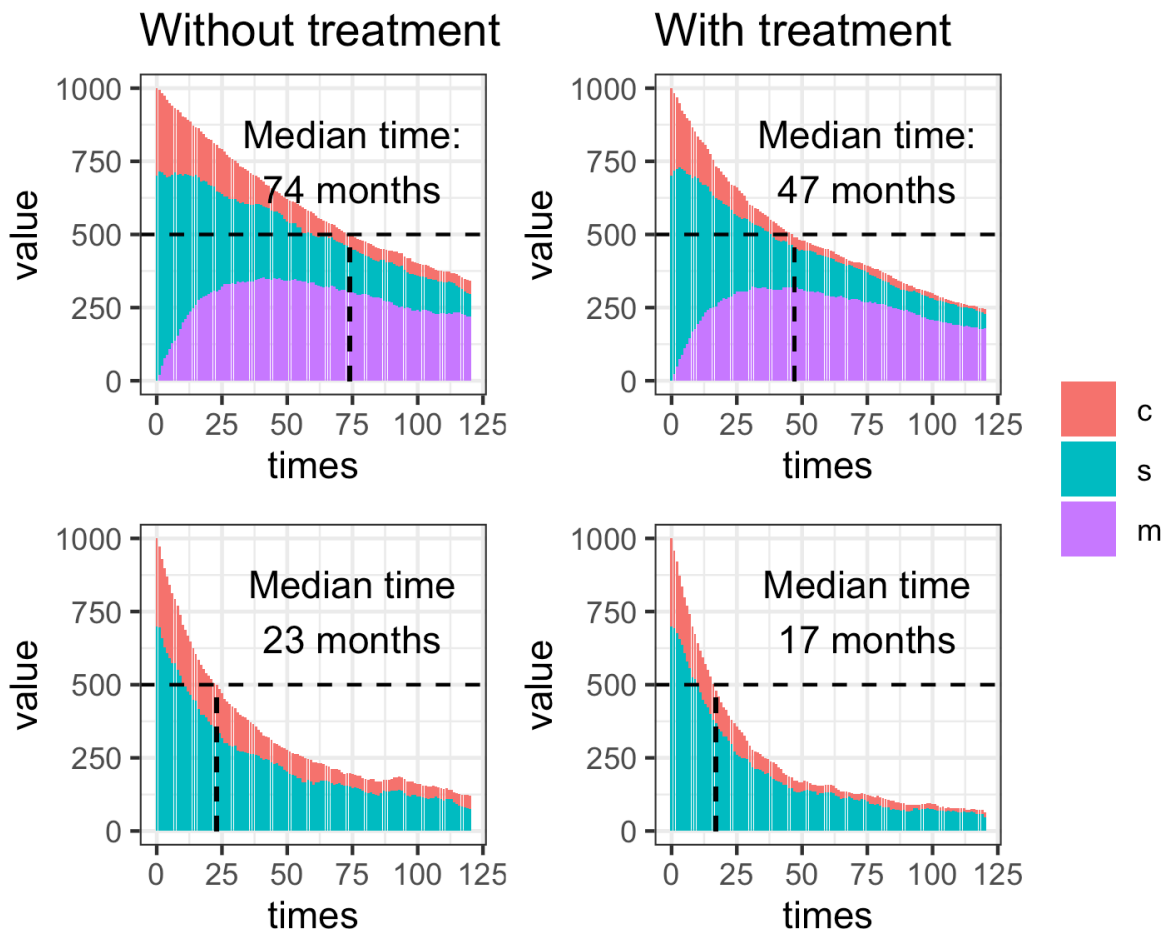

**Figure 19 – Duration from clinical/subclinical 30/70 split**

Median duration of infectious and all disease with and without treatment, starting with a cohort of 30% clinical and 70% subclinical individuals

## S9 Sensitivity Analyses

We have run sensitivity analyses on different areas of the main analysis. For the purposes of comparison, we have included the median parameter estimates, and key outputs; median duration of disease, percentage of people clinical, undulating, subclinical, and minimal after 5 years, and the number of people who have died from TB over 10 years.

### S9.1 Fitting

#### S9.1.1 Bootstrap studies

We ran the fit process removing the data from one study at a time. Table 4 shows the key outputs, showing that no one study is driving the fit, with similar results when each study is removed.

**Table 4 – Sensitivities, bootstrapped***A summary of the differences in fit when removing one study at a time*

| study | min-sub | sub-min | sub-clin | clin-sub | duration | clinical5 | undulating5 | subclinical5 | minimal5 | dead10 | treated5 | recovered5 |
|-------|---------|---------|----------|----------|----------|-----------|-------------|--------------|----------|--------|----------|------------|
| Main  | 0.16    | 0.42    | 0.50     | 1.26     | 23       | 3.45      | 9.66        | 13.52        | 30.36    | 38.75  | 0        | 12.68      |
| 39-42 | 0.09    | 0.39    | 1.44     | 2.52     | 24       | 2.08      | 13.69       | 6.95         | 29.42    | 44.72  | 0        | 12.14      |
| 25,26 | 0.09    | 0.39    | 1.66     | 2.85     | 23       | 1.78      | 15.41       | 5.93         | 28.67    | 45.68  | 0        | 12.31      |
| 12    | 0.09    | 0.39    | 1.62     | 2.81     | 23       | 1.84      | 14.54       | 6.48         | 28.18    | 45.77  | 0        | 12.38      |
| 10    | 0.09    | 0.39    | 1.16     | 2.23     | 24       | 2.50      | 12.35       | 8.85         | 31.09    | 42.28  | 0        | 11.91      |
| 28-36 | 0.09    | 0.38    | 2.21     | 3.46     | 24       | 1.20      | 17.38       | 4.59         | 27.00    | 47.88  | 0        | 11.78      |
| 38    | 0.10    | 0.39    | 0.79     | 1.75     | 23       | 2.60      | 9.92        | 10.48        | 31.41    | 39.43  | 0        | 13.64      |
| 30    | 0.09    | 0.39    | 1.33     | 2.38     | 23       | 2.18      | 13.03       | 8.12         | 29.81    | 43.61  | 0        | 12.18      |
| 15    | 0.10    | 0.39    | 1.13     | 2.13     | 23       | 2.50      | 11.91       | 8.40         | 29.95    | 42.62  | 0        | 12.99      |
| 13,14 | 0.09    | 0.39    | 1.50     | 2.61     | 23       | 2.03      | 13.96       | 7.14         | 28.71    | 44.81  | 0        | 12.54      |
| 20,21 | 0.09    | 0.39    | 1.43     | 2.54     | 23       | 2.10      | 14.01       | 7.32         | 29.05    | 43.94  | 0        | 12.63      |
| 45    | 0.10    | 0.39    | 1.27     | 2.28     | 24       | 2.47      | 12.75       | 8.26         | 29.86    | 43.61  | 0        | 12.24      |
| 43    | 0.09    | 0.39    | 1.33     | 2.39     | 23       | 2.54      | 12.68       | 8.33         | 29.69    | 43.43  | 0        | 12.59      |
| 11    | 0.09    | 0.39    | 1.32     | 2.85     | 23       | 1.49      | 12.82       | 8.74         | 31.77    | 39.81  | 0        | 13.54      |
| 18    | 0.09    | 0.39    | 1.44     | 2.58     | 23       | 1.98      | 12.98       | 7.46         | 30.16    | 43.88  | 0        | 12.46      |
| 44    | 0.10    | 0.39    | 1.09     | 2.06     | 22       | 2.64      | 11.68       | 8.88         | 29.69    | 42.88  | 0        | 12.93      |
| 9     | 0.09    | 0.39    | 1.50     | 2.64     | 23       | 2.31      | 13.67       | 6.99         | 29.43    | 44.12  | 0        | 12.30      |
| 37    | 0.09    | 0.38    | 4.03     | 6.21     | 23       | 0.39      | 19.76       | 2.10         | 26.97    | 48.80  | 0        | 11.87      |
| 8     | 0.09    | 0.38    | 2.20     | 3.49     | 24       | 1.36      | 16.68       | 4.55         | 28.81    | 45.93  | 0        | 11.76      |
| 24    | 0.10    | 0.39    | 1.25     | 2.27     | 24       | 2.59      | 11.91       | 8.66         | 29.66    | 43.53  | 0        | 12.28      |
| 23    | 0.12    | 0.40    | 0.82     | 1.68     | 23       | 3.19      | 10.87       | 10.36        | 29.59    | 41.73  | 0        | 13.15      |
| 22    | 0.10    | 0.39    | 0.92     | 1.67     | 23       | 3.30      | 10.85       | 9.35         | 29.26    | 42.90  | 0        | 12.33      |
| 16,17 | 0.09    | 0.38    | 2.92     | 4.21     | 23       | 0.92      | 18.30       | 3.10         | 26.80    | 49.40  | 0        | 11.40      |
| 16,19 | 0.10    | 0.39    | 1.39     | 2.50     | 23       | 2.29      | 12.80       | 7.33         | 29.68    | 43.67  | 0        | 13.42      |

27      0.09    0.39    1.32    2.38      24    2.38      12.60      8.19    29.38    44.24      0      12.33

### S9.1.2 Change recovery

We ran the fit, with all available data, but changing the fixed value of recovery per year from minimal. As highlighted in section 1.5.2, Figure 5, we have tested both 0.05 and 0.15, 0.05 above and below the fixed value of 0.1 used in the main analysis. Table

**Table 5 – Sensitivities, recovery from minimal**

*A summary of the differences in fit when varying the rate of recovery from minimal*

| recovery | min-sub | sub-min | sub-clin | clin-sub | duration | clinical5 | undulating5 | subclinical5 | minimal5 | dead10 | treated5 | recovered5 |
|----------|---------|---------|----------|----------|----------|-----------|-------------|--------------|----------|--------|----------|------------|
| Main     | 0.16    | 0.42    | 0.50     | 1.26     | 23       | 3.45      | 9.66        | 13.52        | 30.36    | 38.75  | 0        | 12.68      |
| 0.05     | 0.08    | 0.38    | 1.69     | 2.60     | 23       | 1.73      | 16.06       | 5.18         | 32.55    | 48.01  | 0        | 6.70       |
| 0.15     | 0.11    | 0.39    | 1.31     | 2.58     | 23       | 1.99      | 12.96       | 8.69         | 25.16    | 41.58  | 0        | 18.09      |
| 0        | 0.08    | 0.38    | 1.19     | 1.69     | 23       | 3.74      | 11.38       | 7.58         | 38.36    | 49.26  | 0        | 0.00       |

### S9.1.3 Change duration of infectiousness

The duration of infectiousness holds a fixed value of 2 years in the main analysis. In table 6 we change this fixed value to 18 months and 3 years.

**Table 6 – Sensitivities, duration of infectiousness**

*A summary of the differences in fit when testing different durations of infectiousness*

| duration  | min-sub | sub-min | sub-clin | clin-sub | duration | clinical5 | undulating5 | subclinical5 | minimal5 | dead10 | treated5 | recovered5 |
|-----------|---------|---------|----------|----------|----------|-----------|-------------|--------------|----------|--------|----------|------------|
| Main      | 0.16    | 0.42    | 0.50     | 1.26     | 23       | 3.45      | 9.66        | 13.52        | 30.36    | 38.75  | 0        | 12.68      |
| 18 months | 0.11    | 0.63    | 1.20     | 1.33     | 17       | 3.61      | 7.94        | 4.45         | 31.60    | 46.00  | 0        | 13.82      |
| 3 years   | 0.09    | 0.23    | 1.18     | 4.45     | 34       | 0.57      | 15.85       | 18.39        | 27.03    | 37.14  | 0        | 10.80      |

### S9.1.4 Change proportion of minimal “true minimal”

**Table 7 – Sensitivities, proportion of true minimal**

*A summary of the differences in fit when changing the proportion of people that have x-ray changes due to TB disease*

| prop_min | min-sub | sub-min | sub-clin | clin-sub | duration | clinical5 | undulating5 | subclinical5 | minimal5 | dead10 | treated5 | recovered5 |
|----------|---------|---------|----------|----------|----------|-----------|-------------|--------------|----------|--------|----------|------------|
|----------|---------|---------|----------|----------|----------|-----------|-------------|--------------|----------|--------|----------|------------|



|      |      |      |      |      |    |      |       |       |       |       |   |       |
|------|------|------|------|------|----|------|-------|-------|-------|-------|---|-------|
| Main | 0.16 | 0.42 | 0.50 | 1.26 | 23 | 3.45 | 9.66  | 13.52 | 30.36 | 38.75 | 0 | 12.68 |
| 100% | 0.07 | 0.38 | 1.44 | 2.53 | 24 | 2.13 | 13.26 | 6.90  | 35.98 | 43.62 | 0 | 6.91  |
| 60%  | 0.07 | 0.38 | 1.48 | 2.59 | 24 | 2.18 | 12.57 | 7.07  | 26.21 | 42.16 | 0 | 17.74 |

### S9.1.5 Change assumption on persistent symptoms

The studies where there was only information about the symptom state at the start, in the main analysis, we have assumed this symptom state persists. These data were from minimal to either subclinical or clinical, and so for this sensitivity, we have changed them all to minimal to infectious. The results are in table 8.

**Table 8 – Sensitivities, unreported symptoms**

*A summary of the difference in fit, and the subsequent analyses, when removing the assumption that symptoms persist*

| symptoms assumption | min-sub | sub-min | sub-clin | clin-sub | duration | clinical5 | undulating5 | subclinical5 | minimal5 | dead10 | treated5 | recovered5 |
|---------------------|---------|---------|----------|----------|----------|-----------|-------------|--------------|----------|--------|----------|------------|
| Main                | 0.16    | 0.42    | 0.50     | 1.26     | 23       | 3.45      | 9.66        | 13.52        | 30.36    | 38.75  | 0        | 12.68      |
| no                  | 0.10    | 0.39    | 0.77     | 1.70     | 23       | 3.00      | 10.06       | 11.15        | 31.74    | 38.38  | 0        | 13.08      |

## S9.2 Cohort model

### S9.2.1 Parameter values

The method of parameter choice for the simulation was one of three. In the main analysis, each step of the model, for each individual, the relevant parameters were chosen randomly from the posterior distribution. For the other two alternatives, we randomly sampled the parameters at the start of the simulation for each individual and fixed them for the whole run, and the other used the median parameters for each person. Table 9 shows that there is very little difference between either method overall.

**Table 9 – Sensitivities, parameter choice in analysis**

*A summary of the differences in analysis when testing different method of parameter choice for the cohort model*

| method | min-sub | sub-min | sub-clin | clin-sub | duration | clinical5 | undulating5 | subclinical5 | minimal5 | dead10 | treated5 | recovered5 |
|--------|---------|---------|----------|----------|----------|-----------|-------------|--------------|----------|--------|----------|------------|
| Main   | 0.16    | 0.42    | 0.5      | 1.26     | 23       | 3.45      | 9.66        | 13.52        | 30.36    | 38.75  | 0        | 12.68      |
| fixed  | 0.16    | 0.42    | 0.5      | 1.26     | 23       | 2.93      | 9.70        | 13.62        | 30.30    | 38.47  | 0        | 12.76      |
| median | 0.16    | 0.42    | 0.5      | 1.26     | 23       | 3.30      | 9.68        | 14.31        | 29.97    | 38.26  | 0        | 13.11      |

### S9.2.2 Treatment

Treatment was added to the model to simulate a case detection rate for a care pathway initiated by self reported symptoms. When considered in the main analysis, the case detection rate was implemented at 70%. In table 10 we compare the difference between case detection rates at 50%, 70%, and 90%.

**Table 10 – Sensitivities, effect of treatment**

*A summary of the differences in analysis when testing different passive case detection rates*

| treatment | min-sub | sub-min | sub-clin | clin-sub | duration | clinical5 | undulating5 | subclinical5 | minimal5 | dead10 | treated5 | recovered5 |
|-----------|---------|---------|----------|----------|----------|-----------|-------------|--------------|----------|--------|----------|------------|
| Main      | 0.16    | 0.42    | 0.5      | 1.26     | 23       | 3.45      | 9.66        | 13.52        | 30.36    | 38.75  | 0.00     | 12.68      |
| 0.5       | 0.16    | 0.42    | 0.5      | 1.26     | 17       | 1.28      | 6.32        | 9.28         | 25.39    | 25.97  | 24.66    | 11.34      |
| 0.7       | 0.16    | 0.42    | 0.5      | 1.26     | 15       | 0.88      | 5.65        | 8.17         | 23.95    | 22.60  | 31.11    | 10.74      |
| 0.9       | 0.16    | 0.42    | 0.5      | 1.26     | 13       | 0.65      | 5.00        | 7.73         | 22.24    | 20.64  | 36.10    | 10.24      |

### S9.2.3 Trajectories

The trajectories are based on two variables, the proportion of time in a single state, and the number of state changes both over the previous 12 months. The main analysis defines undulating as less than nine months in a single state or 3 or more changes in state. In table 11 we compare the definition of undulation as less than 8 months or less than 10 months, whilst keeping the number of state changes fixed at 3 or more. In table 12 we compare the definition of undulation with less than 9 months fixed, and the state changes as either 2 or more, or 4 or more.

**Table 11 – Sensitivities, undulation definition, months**

*A summary of the differences in analysis when varying the threshold for undulating trajectories*

| states | min-sub | sub-min | sub-clin | clin-sub | duration | clinical5 | undulating5 | subclinical5 | minimal5 | dead10 | treated5 | recovered5 |
|--------|---------|---------|----------|----------|----------|-----------|-------------|--------------|----------|--------|----------|------------|
| Main   | 0.16    | 0.42    | 0.5      | 1.26     | 23       | 3.45      | 9.66        | 13.52        | 30.36    | 38.75  | 0        | 12.68      |
| 7      | 0.16    | 0.42    | 0.5      | 1.26     | 23       | 5.01      | 3.09        | 16.26        | 32.13    | 38.52  | 0        | 13.68      |
| 8      | 0.16    | 0.42    | 0.5      | 1.26     | 23       | 4.10      | 6.68        | 15.39        | 30.71    | 38.08  | 0        | 13.13      |
| 10     | 0.16    | 0.42    | 0.5      | 1.26     | 24       | 2.50      | 13.40       | 11.69        | 29.74    | 37.47  | 0        | 13.07      |
| 11     | 0.16    | 0.42    | 0.5      | 1.26     | 22       | 1.92      | 15.81       | 9.76         | 28.08    | 38.46  | 0        | 13.63      |

**Table 12 – Sensitivities, undulation definition, state changes**

*A summary of the differences in analysis when varying the threshold for undulating trajectories*

| changes | min-sub | sub-min | sub-clin | clin-sub | duration | clinical5 | undulating5 | subclinical5 | minimal5 | dead10 | treated5 | recovered5 |
|---------|---------|---------|----------|----------|----------|-----------|-------------|--------------|----------|--------|----------|------------|
| Main    | 0.16    | 0.42    | 0.5      | 1.26     | 23       | 3.45      | 9.66        | 13.52        | 30.36    | 38.75  | 0        | 12.68      |
| 2       | 0.16    | 0.42    | 0.5      | 1.26     | 23       | 2.80      | 12.56       | 11.58        | 29.62    | 38.19  | 0        | 13.39      |
| 4       | 0.16    | 0.42    | 0.5      | 1.26     | 24       | 2.82      | 10.14       | 13.58        | 30.96    | 37.77  | 0        | 12.54      |

## References

- 1 Tiemersma EW, Werf MJ van der, Borgdorff MW, Williams BG, Nagelkerke NJD. Natural history of tuberculosis: Duration and fatality of untreated pulmonary tuberculosis in HIV negative patients: A systematic review. *PLoS ONE* 2011; **6**: e17601.
- 2 Ragonnet R, Flegg JA, Brilleman SL, Tiemersma EW, Melsew YA, McBryde ES *et al*. Revisiting the natural history of pulmonary tuberculosis: A bayesian estimation of natural recovery and mortality rates. *Clin Infect Dis* 2020. doi:[10.1093/cid/ciaa602](https://doi.org/10.1093/cid/ciaa602).
- 3 Szucs E. Sputum examination in so-called closed tuberculosis. *JAMA* 1926; **86**: 946.
- 4 Tattersall WH. The survival of sputum-positive consumptives: A study of 1,192 cases in a county borough between 1914 and 1940. *Tubercle* 1947; **28**: 85–96.
- 5 Lindhardt M. *The statistics of pulmonary tuberculosis in denmark, 1925-1934; a statistical investigation on the occurrence of pulmonary tuberculosis in the period 1925-1934, worked out on the basis of the danish national health service file of notified cases and of deaths*. EMunksgaard: Copenhagen, 1939.
- 6 Blahd M, Leslie EI, Rosenthal SR. Infectiousness of the ‘closed case’ in tuberculosis. *Am J Public Health Nations Health* 1946; **36**: 723–726.
- 7 Association NT. *Diagnostic standards and classification of tuberculosis*. 1940 ed. New York, N.Y., 1940<http://hdl.handle.net/2027/coo.31924089435949>.
- 8 Okada K, Onozaki I, Yamada N, Yoshiyama T, Miura T, Saint S *et al*. Epidemiological impact of mass tuberculosis screening: A 2 year follow-up after a national prevalence survey. 2012; **NA**.
- 9 Downes J. The study of mortality among individuals with active pulmonary tuberculosis. 1938; **16**: 304–317.
- 10 Beeuwkes H, Hahn RG, Putnam P. A survey of persons exposed to tuberculosis in the household. *Am Rev Tuberc* 1942; **45**: 165–193.
- 11 Puffer RR, Stewart HC, Gass RS. Tuberculosis according to age, sex, family history, and contact. *Am Rev Tuberc* 1945; **51**: 295–311.
- 12 Puelma HO, Grebe G. Analysis of one hundred cases of minimal pulmonary tuberculosis. *Dis Chest* 1945; **11**: 375–379.
- 13 BOBROWITZ ID., HURST A., MARTIN M. Minimal tuberculosis; the prognosis and clinical significance of a sanatorium treated group. *American review of tuberculosis* 1947; **56**: 110–125.
- 14 BOBROWITZ ID., HURST A. Minimal tuberculosis; problems in roentgenologic interpretation. *Radiology* 1949; **52**: 519–32.

- 15 Childress WG. Clinical evaluation, treatment, and follow-up of newly acquired tuberculous lesions. *New York State Journal of Medicine* 1947; **47**: 2560–4.
- 16 Bosworth E.B., Alling D.W. The after-history of pulmonary tuberculosis. I. Methods of evaluation. *American Review of Tuberculosis* 1954; **69**: 37–49.
- 17 Lincoln NS, Bosworth EB, Alling DW. The after-history of pulmonary tuberculosis. III. Minimal tuberculosis. *Am Rev Tuberc* 1954; **70**: 15–31.
- 18 Streptomycin treatment of pulmonary tuberculosis: A medical research council investigation. *BMJ* 1948; **2**: 769–782.
- 19 Alling D.W., Bosworth E.B., Lincoln N.S. The after-history of pulmonary tuberculosis. V. Moderately advanced tuberculosis. *American Review of Tuberculosis* 1955; **71**: 519–528.
- 20 Borgen L., Meyer SN., Refsum E. Mass photofluorography, tuberculin testing, and BCG vaccination in the district of aker (norway) 1947-49. *Acta tuberculosea Scandinavica* 1951; **25**: 327–55.
- 21 Refsum E. Mass investigation by photofluorography; an illustration of the value of the method in combating tuberculosis. *Acta tuberculosea Scandinavica* 1952; **27**: 288–302.
- 22 Manser H. [Tuberculosis in aged and its course during sanatorium treatment]. *Schweizerische Zeitschrift fur Tuberkulose Revue suisse de la tuberculose Rivista svizzera della tubercolosi* 1953; **10**: 65–82.
- 23 K. B. [Public health x-ray diagnosis of closed pulmonary tuberculosis later proved contagious]. *Beitrage zur Klinik der Tuberkulose und spezifischen Tuberkulose-Forschung* 1954; **111**: 437–44.
- 24 Sikand BK, Narain R, Mathur GP. Incidence of TB as judged by re-surveys. A study of delhi police. *Indian Journal of Tuberculosis* 1959; **6**: 73–83.
- 25 Tuberculosis Society of Scotland. A controlled trial of chemotherapy in pulmonary tuberculosis of doubtful activity. Report from the research committee of the tuberculosis society of scotland. *Tubercle* 1958; **39**: 129–137.
- 26 Society ST. A controlled trial of chemotherapy in pulmonary tuberculosis of doubtful activity. *Tubercle* 1963; **44**: 39–46.
- 27 Frimodt-Moller J. Results of treatment of non-bacillary tuberculosis in a domiciliary treatment programme, preliminary report. Proceedings of the 20th tuberculosis and chest diseases workers' conference. 1965, p 133.
- 28 National Tuberculosis Institute B. Tuberculosis in a rural population of south india: A five-year epidemiological study. *Bull World Health Organ* 1974; **51**: 473–88.
- 29 Chakraborty AK, Singh H, Srikantan K, Rangaswamy KR, Krishnamurthy MS, Stephen JA. Tuberculosis in a rural population of south india: Report on five surveys. *Indian Journal of Tuberculosis* 1982; **29**: 153–167.

- 30 Gothi GD, Chakraborty AK, Krishnamurthy VV, Banerjee GC. Prevalence and incidence of sputum negative active pulmonary tuberculosis and fate of pulmonary radiological abnormalities found in rural population. *Indian Journal of Tuberculosis* 1978; **25**: 122–131.
- 31 Krishnamurthy VV, Nair SS, Gothi GD. A comparison of new cases (incidence cases) who had come from different epidemiological groups in the population. *Indian Journal of Tuberculosis* 1978; **25**: 144–146.
- 32 Gothi GD, Chakraborty AK, Jayalakshmi MJ. Incidence of sputum positive tuberculosis in different epidemiological groups during five year follow up of a rural population in south india. *Indian Journal of Tuberculosis* 1978; **25**: 83–91.
- 33 Krishnamurthy VV, Nair SS, Gothi GD, Chakraborty AK. Incidence of tuberculosis among newly infected population and in relation to the duration of infected status. *Indian Journal of Tuberculosis* 1976; **23**.
- 34 Gothi GD, Nair SS, Chakraborty AK, Ganapathy KT. Five year incidence of tuberculosis and crude mortality in relation to non-specific tuberculin sensitivity. *Indian Journal of Tuberculosis* 1976; **23**.
- 35 Chakraborty AK, Gothi GD. Relapses among naturally cured cases of pulmonary tuberculosis. *Indian Journal of Tuberculosis* 1976; **23**: 8–13.
- 36 Gothi GD, Chakraborty AK, Banerjee GC. Interpretation of photofluorograms of active pulmonary tuberculosis patients found in epidemiological survey and their five year fate. *Indian Journal of Tuberculosis* 1974; **11**: 90–97.
- 37 Pamra SP, Mathur GP. Effects of chemoprophylaxis on minimal pulmonary tuberculosis lesions of doubtful activity. *Bull World Health Organ* 1971; **45**: 593–602.
- 38 Aneja KS, Gothi GD, Samuel GER. Controlled study of the effect of specific treatment on bacteriological status of 'suspect cases'. *Indian J Tuberc* 1979; **26**: 50–57.
- 39 Hong Kong Chest Service/Tuberculosis Research Centre MMRC. A controlled trial of 2-month, 3-month, and 12-month regimens of chemotherapy for sputum smear-negative pulmonary tuberculosis: The results at 30 months. *Am Rev Respir Dis* 1981; **124**: 138–142.
- 40 Hong Kong Chest Service/Tuberculosis Research Centre MMRC. A controlled trial of 2-month, 3-month, and 12-month regimens of chemotherapy for sputum-smear-negative pulmonary tuberculosis. *Am Rev Respir Dis* 1984; **130**: 23–28.
- 41 Hong Kong Chest Service/Tuberculosis Research Centre MMRC. Sputum smear negative pulmonary tuberculosis controlled trial of 3-month and 2-month regimen of chemotherapy: First report. *The Lancet* 1979; **313**: 1361–1363.
- 42 Hong Kong Chest Service/Tuberculosis Research Centre MMRC. A study of the characteristics and course of sputum smear-negative pulmonary tuberculosis. *Tubercle* 1981; **62**: 155–167.

- 43 Cowie RL. Diagnosis of sputum smear- and sputum culture-negative pulmonary tuberculosis. *SAMJ* 1985; **68**: 878.
- 44 Anastasatu C, Berceea O, Corlan E. Controlled clinical trial on smear negative, x-ray positive new cases, with the view to establishing if and how to treat them. *Bull Int Union Tub* 1985; **60**: 108–109.
- 45 Norregaard J. Abacillary pulmonary tuberculosis. *Tubercle* 1990; **71**: 35–38.
- 46 Madsen T. Studies on the epidemiology of tuberculosis in denmark. *Acta Tuberculosea Scand (suppl)* 1942; **Supp 6**: 1–176.
- 47 Efficacy of various durations of isoniazid preventive therapy for tuberculosis: Five years of follow-up in the IUAT trial. *Bulletin of the World Health Organization* 1982; **60**: 555–564.
- 48 GROTH-PETERSEN E., KNUDSEN J., WILBEK E. Epidemiological basis of tuberculosis eradication in an advanced country. *Bulletin of the World Health Organization* 1959; **21**: 5–49.
- 49 Groth-Petersen E, Østergaard F. Mass chemoprophylaxis of tuberculosis. The acceptability and untoward side effects of isoniazid in a control study in greenland. *Am Rev Respir Dis* 1960; **81**: 643–652.
- 50 Styblo K, Dajkova D, Kubik A, Langerova M, Radkovsky J. Epidemiological and clinical study of tuberculosis in the district of kolin, czechoslovakia. ; : 56.
- 51 Rubinshteyn GR, Kochnova IE. Pulmonary tuberculosis: Inital stage and development in adults. *Acta Med,URSS* 1940; **3**: 250–265.
